# Supplementary material for: A systematic, complexity-reduction approach to dissect the kombucha tea microbiome
Source: eLife. 2022 Aug 11;11:e76401. doi: 10.7554/eLife.76401 (PMC9371603; doi:10.7554/eLife.76401)
Supplement: Figure 2—source data 1. [file elife-76401-fig2-data1.xlsx]

## Sheet: Bacteria
List of isolated bacterial species. Representative species diversity is given by the identification of 16S rRNA gene sequence of 33 bacterial isolates.
Strain ID	Strain	Origin	Accession number
KTB1 (B5)	Acetobacter senegalensis	Sample B	OK178227
KTB2	Acetobacter senegalensis	Sample B	OK178228
KTB3	Acetobacter senegalensis	Sample B	OK178229
KTB4	Acetobacter tropicalis	Sample B	OK178230
KTB5	Acetobacter tropicalis	Sample B	OK178231
KTB6	Acetobacter tropicalis	Sample B	OK178232
KTB7	Acetobacter musti	Sample C	OK178233
KTB8	Acetobacter peroxydans	Sample D	OK178234
KTB9	Acetobacter peroxydans	Sample D	OK178235
KTB10 (B4)	Gluconobacter oxydans	Sample A	OK178236
KTB11	Gluconobacter oxydans	Sample A	OK178237
KTB12	Gluconobacter oxydans	Sample A	OK178238
KTB13	Gluconobacter oxydans	Sample A	OK178239
KTB14	Gluconobacter oxydans	Sample D	OK178240
KTB15	Gluconobacter oxydans	Sample D	OK178241
KTB16	Gluconobacter oxydans	Sample D	OK178242
KTB17	Gluconobacter oxydans	Sample D	OK178243
KTB18 (B3)	Gluconacetobacter europaeus	Sample D	OK178244
KTB19	Komagataeibacter xylinus	Sample A	OK178245
KTB20 (B1)	Komagataeibacter rhaeticus	Sample A	OK178246
KTB21	Komagataeibacter rhaeticus	Sample B	OK178247
KTB22	Komagataeibacter rhaeticus	Sample B	OK178248
KTB23	Komagataeibacter rhaeticus	Sample D	OK178249
KTB24	Komagataeibacter rhaeticus	Sample A	OK178250
KTB25	Komagataeibacter rhaeticus	Sample C	OK178251
KTB26 (B2)	Komagataeibacter intermedius	Sample D	OK178252
KTB27	Komagataeibacter intermedius	Sample D	OK178253
KTB28	Komagataeibacter intermedius	Sample D	OK178254
KTB29	Komagataeibacter intermedius	Sample C	OK178255
KTB30	Komagataeibacter intermedius	Sample D	OK178256
KTB31	Komagataeibacter saccharivorans	Sample A	OK178257
KTB32	Oenococcus oeni	Sample B	OK178258
KTB33	Oenococcus oeni	Sample B	OK178259

## Sheet: Yeasts
List of isolated fungal species. Representative species diversity is given by the identification of D1/D2 large ribosomal subunit region sequence of 30 yeast isolates.
Strain ID	Strain	Origin	Accession number
KTY1 (Y1)	Brettanomyces bruxellensis	Sample A	OK271194
KTY2	Brettanomyces bruxellensis	Sample A	OK271195
KTY3	Brettanomyces bruxellensis	Sample A	OK271196
KTY4	Brettanomyces bruxellensis	Sample A	OK271197
KTY5	Brettanomyces bruxellensis	Sample D	OK271198
KTY6	Brettanomyces bruxellensis	Sample B	OK271199
KTY7	Brettanomyces bruxellensis	Sample C	OK271200
KTY8	Brettanomyces bruxellensis	Sample D	OK271201
KTY9	Brettanomyces bruxellensis	Sample A	OK271202
KTY10	Brettanomyces bruxellensis	Sample C	OK271203
KTY11	Brettanomyces bruxellensis	Sample C	OK271204
KTY12	Brettanomyces bruxellensis	Sample D	OK271205
KTY13	Brettanomyces bruxellensis	Sample D	OK271206
KTY14	Brettanomyces bruxellensis	Sample D	OK271207
KTY15	Brettanomyces anomalus	Sample D	OK271208
KTY16	Pichia fermentans	Sample B	OK271209
KTY17	Pichia fermentans	Sample B	OK271210
KTY18 (Y3)	Candida sake	Sample B	OK271211
KTY19	Candida sake	Sample B	OK271212
KTY20	Candida sake	Sample B	OK271213
KTY21	Candida sake	Sample B	OK271214
KTY22	Candida sake	Sample B	OK271215
KTY23	Candida sake	Sample B	OK271216
KTY24 (Y4)	Lachancea fermentati	Sample D	OK271217
KTY25	Lachancea fermentati	Sample D	OK271218
KTY26	Lachancea fermentati	Sample D	OK271219
KTY27	Lachancea fermentati	Sample D	OK271220
KTY28	Lachancea fermentati	Sample D	OK271221
KTY29 (Y5)	Schizosaccharomyces pombe	Sample D	OK271222
KTY30 (Y2)	Zygosaccharomyces bailii	Sample D	OK271223
