# Supplementary material for: A systematic, complexity-reduction approach to dissect the kombucha tea microbiome
Source: eLife. 2022 Aug 11;11:e76401. doi: 10.7554/eLife.76401 (PMC9371603; doi:10.7554/eLife.76401)
Supplement: Figure 2—source data 2. [file elife-76401-fig2-data2.xlsx]

## Sheet: Sheet1
		B1Y1	B1Y2	B1Y3	B1Y4	B1Y5	B2Y1	B2Y2	B2Y3	B2Y4	B2Y5	B3Y1	B3Y2	B3Y3	B3Y4	B3Y5	B4Y1	B4Y2	B4Y3	B4Y4	B4Y5	B5Y1	B5Y2	B5Y3	B5Y4	B5Y5	B1	B2	B3	B4	B5	Y1	Y2	Y3	Y4	Y5
Bacteria	1	6.21748	7.21352	7.04336	5.94694	6.44091	5.94694	6.71809	3.12057	6.06819	6.48287	5.61909	6.88081	7.32222	7.12057	4.95904	6.8451	7.14613	3.5682	6.11727	6.71181	5.86332	7.12057	6.94201	5.95904	7.02531	6.85733	-	4.5302	-	7.20412	-	-	-	-	-
	2	6.03342	7.34792	7.05115	5.74036	6.51322	6.29226	6.63347	3.21484	6.02531	6.66276	5.34044	6.88195	7.0569	6.98677	5.17609	6.92428	7.26364	3.66745	6.11394	6.65321	5.85126	6.95424	7.15534	5.91908	6.9345	6.86332	-	4.57978	-	7.21748	-	-	-	-	-
	3	6.4014	7.07918	7.08991	6.14922	6.59106	6.30103	6.73239	3.33041	6.0569	6.29003	5.88874	6.88024	7.18184	7.04532	5.40312	7.03342	7.4133	3.51851	6.12385	6.76716	5.90309	7.03342	7.04532	6.05308	7.14613	6.86923	-	4.5563	-	7.20683	-	-	-	-	-
		B1Y1	B1Y2	B1Y3	B1Y4	B1Y5	B2Y1	B2Y2	B2Y3	B2Y4	B2Y5	B3Y1	B3Y2	B3Y3	B3Y4	B3Y5	B4Y1	B4Y2	B4Y3	B4Y4	B4Y5	B5Y1	B5Y2	B5Y3	B5Y4	B5Y5	B1	B2	B3	B4	B5	Y1	Y2	Y3	Y4	Y5
Yeast	1	6.62839	6.90309	7.4624	6.6902	6.44248	7.76343	7.3075	7.58883	6.78176	6.57978	7.85733	7.21352	7.20412	7.38021	7.03941	7.63347	7.17609	7.44716	6.90309	6.88081	7.85126	6.67669	7.35218	6.79588	7.03743	-	-	-	-	-	8.05308	7.76343	7.25527	7.3962	7.15229
	2	6.53403	7.11394	7.18469	6.6902	6.43775	7.78533	7.20412	7.42325	6.62839	6.53908	7.80956	7.18469	7.20412	7.37475	7.19866	7.549	6.77815	7.36922	6.80956	6.90309	7.76343	6.84198	7.34439	6.90037	7.03743	-	-	-	-	-	8.05308	7.56467	7.21484	7.32222	7.19033
	3	6.44716	7.3075	6.87506	6.6902	6.41497	7.79239	7.11059	7.27875	6.47567	6.55991	7.74819	7.14613	7.20952	7.37475	7.36173	7.43775	6.41497	7.27875	6.65321	6.90309	7.67669	7	7.31175	7	6.99123	-	-	-	-	-	8.06819	7.36173	7.18469	7.25285	7.18184
