# Supplementary material for: A systematic, complexity-reduction approach to dissect the kombucha tea microbiome
Source: eLife. 2022 Aug 11;11:e76401. doi: 10.7554/eLife.76401 (PMC9371603; doi:10.7554/eLife.76401)
Supplement: Figure 2—source data 3. [file elife-76401-fig2-data3.xlsx]

## Sheet: Sheet1
	1	2	3	pH	s.d.	1	2	3	Sucrose(g/L)	s.d.	1	2	3	Glucose (g/L)	s.d.	1	2	3	Fructose	s.d.	1	2	3	Glucuronate (g/L)	SD	1	2	3	Acetate (g/L)	s.d.	1	2	3	Ethanol (g/L)	s.d.	1	2	3	Polyphenol (g/L)	s.d.	1	2	3	Flavonoid (g/L)	s.d.
B1Y1	3.65	3.45	3.55	3.55	0.1	23.19	29.48	29.78	27.48	3.72	0.79	1.11	0.82	0.91	0.18	0.5	0.55	1.25	0.77	0.42	0	0	0	0	0	6.18	6.92	6.67	6.59	0.38	7.67	6.37	6.88	6.98	0.66	41.9	16.76	18.78	17.77	1.43	86.35	88.78	85.3	86.81	1.78
B1Y2	3.59	3.48	3.36	3.48	0.12	11.55	9.65	13.34	11.51	1.85	6.02	7	5	6.01	1	6	3	5	4.67	1.53	0	0	0	0	0	3.24	3.1	3.6	3.31	0.26	12.88	16.78	14.34	14.67	1.97	23.89	7.56	8.67	8.11	0.79	86.95	89.34	82.3	86.2	3.58
B1Y3	5.8	5.65	5.23	5.56	0.3	32.94	35.46	29.89	32.76	2.79	1.09	1.2	0.9	1.06	0.15	0	0	0	0	0	0	0	0	0	0	0.71	0.68	0.67	0.69	0.02	1.3	3.4	1.5	2.07	1.16	20.77	8.31	8	8.15	0.22	145.95	150.4	139.3	145.22	5.59
B1Y4	3.62	3.53	3.86	3.67	0.17	6.91	7.6	6.2	6.9	0.7	0	0	0	0	0	0.67	0.5	0.7	0.62	0.11	0	0	0	0	0	3.44	4	2.89	3.44	0.56	24.72	23.45	22.14	23.44	1.29	60.4	24.16	22.34	23.25	1.29	93.67	94.3	92.3	93.42	1.02
B1Y5	3.45	3.56	2.4	3.14	0.64	1.24	1.05	1.43	1.24	0.19	7.56	6	5	6.19	1.29	1.23	1.3	1.4	1.31	0.09	0	0	0	0	0	4.4	4.1	4.7	4.4	0.3	19.57	18.78	17.89	18.75	0.84	8.79	8.25	11.1	9.68	2.02	75.3	74.5	76.5	75.43	1.01
B2Y1	3.47	3.55	3.36	3.46	0.1	29.7	23.55	25.36	26.2	3.16	0	0.03	0.07	0.03	0.04	0.1	0.13	0.14	0.12	0.02	0	0	0	0	0	3.6	3.21	2.9	3.24	0.35	13.58	12.29	10.77	12.21	1.41	136.77	54.71	58.2	56.45	2.47	80.97	80	81.3	80.76	0.68
B2Y2	3.69	3.62	3.72	3.68	0.05	12.03	11.85	12.21	12.03	0.18	1.89	1.67	1.61	1.72	0.15	0.82	0.3	0.3	0.47	0.3	0	0	0	0	0	3.94	3.5	3.7	3.71	0.22	15.36	13.95	14.71	14.67	0.71	100.99	40.4	43.1	41.75	1.91	72.91	67.3	74.1	71.44	3.63
B2Y3	5.42	5.22	5.53	5.39	0.16	42.27	46.08	46.73	45.03	2.41	0.38	0.3	0.4	0.36	0.05	0.4	0.34	0.35	0.36	0.03	0	0	0	0	0	0	0	0	0	0	0.06	0.02	0.03	0.04	0.02	142.54	57.02	62.3	59.66	3.74	112.34	108.3	115	111.88	3.37
B2Y4	3.55	3.77	3.47	3.6	0.16	10.44	14.56	15.12	13.37	2.56	0.78	0.97	0.25	0.67	0.37	0.63	0.93	0.69	0.75	0.16	0	0	0	0	0	3.59	3.64	3.8	3.68	0.11	20.09	17.17	16.86	18.04	1.78	94.5	37.8	34.5	36.15	2.33	81.12	83.4	79.3	81.27	2.05
B2Y5	3.51	3.24	3.05	3.27	0.23	0.2	0.36	0.36	0.31	0.09	0.34	0.33	0.77	0.48	0.25	1.4	2.87	2.03	2.1	0.74	0	0	0	0	0	3.55	4.8	5	4.45	0.79	25.86	23.15	21.58	23.53	2.16	104.11	41.64	43.2	42.42	1.1	88.29	93.2	86.5	89.33	3.47
B3Y1	3.42	3.58	3.16	3.39	0.21	22.42	25.9	24.02	24.11	1.74	0.9	1.28	1.71	1.3	0.41	0.3	0.4	0.3	0.33	0.06	0	0	0	0	0	3.07	4.98	4.6	4.22	1.01	13.45	10.7	10.85	11.66	1.55	95.94	38.38	36.8	37.59	1.12	92.47	94.3	90.3	92.36	2
B3Y2	3.68	3.72	3.58	3.66	0.07	23.12	25	22	23.37	1.52	4.44	5.3	3.7	4.48	0.8	1.67	2.3	3	2.32	0.67	0	0	0	0	0	1.45	3	2.31	2.25	0.78	8.57	9.3	10.1	9.32	0.77	119.96	47.98	52.1	50.04	2.91	74.1	76.5	72.3	74.3	2.11
B3Y3	5.65	5.64	5.56	5.62	0.05	44.66	46.09	42.18	44.31	1.98	0.44	0.54	0.34	0.44	0.1	0	0	0	0	0	0	0	0	0	0	0	0	0	0	0	0.06	0.05	0.07	0.06	0.01	59.92	23.97	23.4	23.68	0.4	128.02	138.4	118.3	128.24	10.05
B3Y4	3.66	3.66	3.36	3.56	0.17	11.21	10.12	12.43	11.25	1.16	0	0	0	0	0	0.21	0.3	0.13	0.21	0.09	0	0	0	0	0	2.94	3.4	2.51	2.95	0.45	26.76	20	23	23.25	3.39	69.28	27.71	26.7	27.21	0.72	74.4	67.2	79.4	73.67	6.13
B3Y5	3.49	3.47	3.42	3.46	0.04	0.24	0.23	0.26	0.24	0.02	0	0	0	0	0	0.09	0.1	0.1	0.1	0.01	0.04	0.05	0.05	0.05	0.01	1.36	1.34	1.38	1.36	0.02	26.16	20.24	22.34	22.91	3	62.56	25.02	24.4	24.71	0.44	97.11	102.3	95.4	98.27	3.59
B4Y1	3.52	3.53	3.44	3.5	0.05	26.06	30.24	27.97	28.09	2.09	0	0.1	0.2	0.1	0.1	0.1	0.38	0.35	0.28	0.15	0.0124664	0.01	0.01	0.01	0	6.52	6.93	6.24	6.56	0.35	7.61	6.68	7.36	7.21	0.48	48.87	19.55	18.1	18.82	1.02	82.77	84.2	80.6	82.52	1.81
B4Y2	4.4	4.04	3.38	3.94	0.52	17.18	16.32	18.78	17.43	1.25	6.35	5.4	7.5	6.42	1.05	0	0	0	0	0	0	0	0	0	0	1.89	2.81	2.45	2.38	0.46	5.52	6.9	7.1	6.51	0.86	57.03	22.81	25.6	24.21	1.97	68.28	70.3	66.5	68.36	1.9
B4Y3	5.42	5.5	5.19	5.37	0.16	40.54	42	39	40.51	1.5	0.92	0.9	0.82	0.88	0.05	0.8	0.8	0.7	0.77	0.06	0	0	0	0	0	0	0	0	0	0	0	0	0	0	0	135.81	54.33	63.2	58.76	6.28	105.02	117.3	98.6	106.97	9.5
B4Y4	3.61	3.61	3.6	3.61	0.01	11.21	12.3	10.34	11.28	0.98	0	0	0	0	0	1.31	1.5	1	1.27	0.25	0.05	0.06	0.07	0.06	0.01	3.53	3.2	3	3.24	0.27	26.92	24.56	22.34	24.61	2.29	73.37	29.35	27.3	28.32	1.45	77.54	75.4	79.7	77.55	2.15
B4Y5	3.42	3.34	2.57	3.11	0.47	2.39	2.12	2.56	2.36	0.22	3.8	2.5	4.5	3.6	1.01	1.33	2.4	2.3	2.01	0.59	0	0	0	0	0	0.97	1.2	0.8	0.99	0.2	23.74	23.78	23.46	23.66	0.17	128.85	51.54	53.4	52.47	1.32	77.84	76.5	76.4	76.91	0.8
B5Y1	3.41	3.4	3.42	3.41	0.01	24.74	25.93	28.2	26.29	1.76	1.1	1.08	1.12	1.1	0.02	1.4	1.34	1.87	1.54	0.29	0	0	0	0	0	5.35	8.05	6.23	6.55	1.38	10.88	7.02	9.19	9.03	1.94	136.29	54.52	58.7	56.61	2.96	101.44	104.3	99.8	101.85	2.28
B5Y2	3.36	3.47	3.31	3.38	0.08	14.34	12.3	15.6	14.08	1.67	7.25	6.1	8.2	7.18	1.05	6	5	4	5	1	0	0	0	0	0	1.41	2.34	2.1	1.95	0.48	13.18	12.13	13.23	12.85	0.62	159.83	63.93	69.3	66.62	3.8	89.34	87.4	90.3	89.01	1.48
B5Y3	5.6	5.48	5.6	5.56	0.07	36.51	40.52	32.34	36.46	4.09	1.42	1.43	1.56	1.47	0.08	1.1	1.3	1.3	1.23	0.12	0	0	0	0	0	0	0	0	0	0	0	0	0	0	0	183.61	73.44	78.4	75.92	3.5	76.94	70.3	80.3	75.85	5.09
B5Y4	3.49	3.51	3.53	3.51	0.02	10.94	13.34	7.98	10.75	2.68	0	0	0	0	0	0.2	0.2	0.21	0.2	0.01	0	0	0	0	0	2.19	2.1	2.23	2.17	0.07	26.8	22.34	22.65	23.93	2.49	124.05	49.62	52.1	50.86	1.76	84.86	80.4	86.9	84.05	3.32
B5Y5	3.44	3.33	3.19	3.32	0.13	0.33	0.23	0.43	0.33	0.1	0	0	0	0	0	0.06	0.05	0.05	0.05	0.01	0.05	0.06	0.08	0.06	0.01	1.81	1.67	1.9	1.79	0.12	28.65	24.67	27.12	26.81	2.01	88.02	35.21	37.4	36.3	1.55	100.84	103.2	98.2	100.75	2.5
B1	4.82	4.73	4.66	4.74	0.08	42.7	43.7	41.3	42.57	1.21	0.91	1	0.8	0.9	0.1	0	0	0	0	0	0	0	0	0	0	0	0	0	0	0	0	0	0	0	0	79.85	31.94	34.5	33.22	1.81	121.45	125.4	119.3	122.05	3.09
B2	4.85	4.87	4.73	4.82	0.08	49.37	49.89	48.78	49.35	0.56	0	0	0	0	0	0	0	0	0	0	0	0	0	0	0	0	0	0	0	0	0	0	0	0	0	124.29	49.71	53.2	51.46	2.46	111.44	101.4	113	108.61	6.3
B3	4.94	4.93	4.83	4.9	0.06	43.63	42.34	44.45	43.47	1.06	0	0	0	0	0	0	0	0	0	0	0	0	0	0	0	0	0	0	0	0	0	0	0	0	0	113.72	45.49	49.8	47.64	3.05	126.83	134.6	120	127.14	7.31
B4	4.68	4.78	4.68	4.71	0.06	48.89	47.79	49.98	48.89	1.1	0	0	0	0	0	0	0	0	0	0	0	0	0	0	0	0.05	0.04	0.05	0.05	0.01	0	0	0	0	0	117.08	46.83	49.7	48.27	2.03	92.47	80.3	102.3	91.69	11.02
B5	5.31	5.21	5.3	5.27	0.05	43.77	42	44.94	43.57	1.48	0	0	0	0	0	0	0	0	0	0	0	0	0	0	0	0	0	0	0	0	0	0	0	0	0	139.18	55.67	58.9	57.29	2.28	118.91	100.4	130.2	116.5	15.05
Y1	3.68	3.74	3.67	3.7	0.04	27.36	26.67	25.34	26.46	1.03	0.2	0.3	0.1	0.2	0.1	0	0	0	0	0	0	0	0	0	0	0.36	0.42	0.35	0.38	0.04	17.85	16.87	17.89	17.54	0.58	136.77	54.71	59.7	57.2	3.53	111.89	109.8	110	110.56	1.15
Y2	3.86	3.87	3.73	3.82	0.08	3.57	4.3	3	3.62	0.65	0	0	0	0	0	0.43	0.3	0.5	0.41	0.1	0	0	0	0	0	0.06	0.05	0.05	0.05	0.01	22.54	21.54	22.56	22.21	0.58	103.63	41.45	40.45	40.95	0.71	54.84	65.4	48.4	56.21	8.58
Y3	5.15	5.05	5.19	5.13	0.07	44.06	44.34	43.93	44.11	0.21	0	0	0	0	0	0	0	0	0	0	0	0	0	0	0	0	0	0	0	0	0	0	0	0	0	103.63	41.45	43.2	42.33	1.24	138.18	149.3	130.2	139.23	9.59
Y4	3.68	3.79	3.84	3.77	0.08	1.12	2.3	0.98	1.47	0.73	0.46	0.5	0.4	0.45	0.05	0.08	0.09	0.1	0.09	0.01	0	0	0	0	0	0.35	0.34	0.37	0.35	0.02	27.2	25.45	26.45	26.37	0.88	64.4	25.76	30.3	28.03	3.21	101.88	97.3	106.4	101.86	4.55
Y5	3.38	3.39	3.43	3.4	0.03	0.2	0.13	0.24	0.19	0.06	0	0	0	0	0	1.14	1.2	0.9	1.08	0.16	0	0	0	0	0	0	0	0	0	0	24.75	25.67	26.78	25.73	1.02	82.58	33.03	35.6	34.32	1.81	118.46	101.2	137.5	119.05	18.16

## Sheet: Read me
Chemical property analysis of the core candidates and their controls.
