# Supplementary material for: A systematic, complexity-reduction approach to dissect the kombucha tea microbiome
Source: eLife. 2022 Aug 11;11:e76401. doi: 10.7554/eLife.76401 (PMC9371603; doi:10.7554/eLife.76401)
Supplement: Figure 2—source data 4. [file elife-76401-fig2-data4.xlsx]

## Sheet: HCA
Hierarchical Clustering
B1Y3
B3Y3	1.04118
B5Y3
B1						11.0318
B3		0.629329			5.96639
Y3	0.227525
B2				3.25777
B4	0.292958
B4Y3			1.49108
B2Y3		0.232709
B5	0.0789583
KC									112.685
B1Y1
B4Y1	0.112269
KB		8.06164
KD	0.221761
Y1
KA	2.64558					11.5592
B5Y1								79.9136
B2Y1					6.23812
B5Y4	1.29463			3.99248
B3Y1			1.77387
B2Y2		0.897898
B2Y4	0.286207
B1Y2							24.2339
B1Y5		5.03371
B4Y2	2.92627
B5Y2			11.9584
B3Y2		3.86929
B4Y5	2.27404
Y5						23.0226
Y4			1.19922
B3Y5		0.607898
B5Y5	0.367999				5.62753
Y2
B2Y5				3.83368
B1Y4			2.09574
B3Y4		0.572946
B4Y4	0.445164

## Sheet: PCA 
Obs ID (Primary)	M1.t(corr)[1]	M1.t(corr)[2]
B1Y1	-0.0887251	-0.0263193
B1Y2	-0.258795	0.0578264
B1Y3	0.234425	0.0504894
B1Y4	-0.0945327	-0.16425
B1Y5	-0.267705	-0.0762069
B2Y1	0.00468202	-0.0470895
B2Y2	-0.0894993	-0.0664444
B2Y3	0.280244	0.134178
B2Y4	-0.0859119	-0.0978928
B2Y5	-0.176071	-0.123375
B3Y1	-0.0429758	-0.0459796
B3Y2	-0.0860774	0.0809825
B3Y3	0.283315	0.0921037
B3Y4	-0.0942458	-0.167333
B3Y5	-0.0791216	-0.17223
B4Y1	-0.0768467	-0.0474796
B4Y2	-0.0829263	0.0319202
B4Y3	0.244659	0.140816
B4Y4	-0.136967	-0.118281
B4Y5	-0.160814	-0.0739541
B5Y1	-0.0629514	0.0266971
B5Y2	-0.185479	0.164036
B5Y3	0.201855	0.174133
B5Y4	-0.0470839	-0.144641
B5Y5	-0.0907219	-0.179738
B1	0.228367	0.0781942
B2	0.260167	0.100342
B3	0.271711	0.0896522
B4	0.225474	0.0893281
B5	0.287025	0.111219
Y1	0.0959825	-0.064444
Y2	-0.0607409	-0.152969
Y3	0.296765	0.0939618
Y4	-0.0330464	-0.189814
Y5	-0.0359734	-0.172412
KA	0.132673	0.0538122
KB	0.0364834	0.00370639
KC	-0.735144	0.571447
KD	-0.0114732	-0.0139924
