# Supplementary material for: A systematic, complexity-reduction approach to dissect the kombucha tea microbiome
Source: eLife. 2022 Aug 11;11:e76401. doi: 10.7554/eLife.76401 (PMC9371603; doi:10.7554/eLife.76401)
Supplement: Figure 3—source data 1. [file elife-76401-fig3-data1.xlsx]

## Sheet: Sheet1
Broth	B2-Y1	0	0	0	Mean	s.d.	1	1	1	Mean	s.d.	2	2	2	Mean	s.d.	3	3	3	Mean	s.d.	6	6	6	Mean	s.d.	10	10	10	Mean	s.d.
B2 counting	100-1	6.29667	6.29667	6.29667	6.29667	0	3.30103	3.69897	3.30103	3.43368	0.229751	4.64345	4.76343	4.8451	4.75066	0.101427	5.30103	5.41497	5.39794	5.37131	0.0614611	6.47712	6.81954	6.65321	6.64996	0.171235	6.41497	6.91381	6.77815	6.70231	0.257923
	10-1	6.25768	6.25768	6.25768	6.25768	0	3.30103	3.30103	3.30103	3.30103	0	4.17609	4.11394	4.17609	4.15538	0.0358811	5.34242	5.38021	5.30103	5.34122	0.0396043	6.54407	6.94448	6.77815	6.75557	0.20116	6.716	6.89209	6.83251	6.81354	0.0895657
	1-1	6	6	6	6	0	2.30103	2.30103	2.30103	2.30103	0	3.44716	3.54407	3.5563	3.51584	0.0597965	5.34242	5.20412	5.25527	5.26727	0.0699278	6.47712	6.92428	6.76343	6.72161	0.226493	6.32222	6.60206	6.4624	6.46223	0.13992
	1-10	5.25768	5.25768	5.25768	5.25768	0	2.30103	2.30103	2.30103	2.30103	0	2.77815	2.8451	2.90309	2.84211	0.0625228	3.30103	3.30103	3.30103	3.30103	0	6.23045	6.30103	6.23045	6.25398	0.04075	6.38021	6.30103	6.34242	6.34122	0.0396043
	1-100	4.29667	4.29667	4.29667	4.29667	0	2.30103	2.30103	2.30103	2.30103	0	2.60206	2.47712	2.60206	2.56041	0.0721334	3.07918	3	2.77815	2.95244	0.156048	5.30103	5.11394	5.17609	5.19702	0.0952833	6.64345	6.89763	6.79934	6.78014	0.12817
	B2-Y1	0	0	0	Mean	s.d.	1	1	1	Mean	s.d.	2	2	2	Mean	s.d.	3	3	3	Mean	s.d.	6	6	6	Mean	s.d.	10	10	10	Mean	s.d.
Y1 counting	100-1	4.29667	4.29667	4.29667	4.29667	0	6.25527	6.41497	6.30103	6.32376	0.0822407	7.44716	7.54407	7.54407	7.51176	0.055951	7.64345	7.60206	7.60206	7.61586	0.0238981	7.6902	7.57978	7.65321	7.64106	0.0561998	7.64345	7.64345	7.64345	7.64345	0
	10-1	5.25768	5.25768	5.25768	5.25768	0	6.716	6.68124	6.50515	6.63413	0.113045	7.44716	7.57978	7.62325	7.55006	0.0917305	7.60206	7.716	7.60206	7.64004	0.0657852	7.5682	7.64345	7.59106	7.60091	0.0385788	7.62325	7.60206	7.62839	7.6179	0.013956
	1-1	6	6	6	6	0	6.716	6.79239	6.76343	6.75727	0.0385642	7.62325	7.61278	7.50515	7.58039	0.0653733	7.73239	7.80618	7.66276	7.73378	0.0717211	7.63347	7.53148	7.5682	7.57772	0.0516562	7.5682	7.57978	7.5563	7.5681	0.0117409
	1-10	6.25768	6.25768	6.25768	6.25768	0	6.89209	6.79239	6.99123	6.8919	0.0994173	7.27875	7.77085	7.60206	7.55056	0.25006	7.8451	7.716	7.76343	7.77484	0.0653	7.63347	7.57978	7.59106	7.60144	0.0283061	7.5682	7.60206	7.5682	7.57949	0.0195481
	1-100	6.29667	6.29667	6.29667	6.29667	0	6.88081	6.92428	6.86923	6.89144	0.0290219	7.5563	7.51851	7.87506	7.64996	0.195858	7.89763	7.83251	7.88081	7.87032	0.0338044	7.63749	7.65321	7.65992	7.65021	0.0115115	7.5682	7.57978	7.5563	7.5681	0.0117409
Biofilm	B2-Y1	0	0	0	Mean	s.d.	3	3	3	Mean	s.d.	6	6	6	Mean	s.d.	8	8	8	Mean	s.d.	10	10	10	Mean	s.d.	14	14	14	Mean	s.d.
B2 counting	100-1	-	-	-	-	-	-	-	-	-	-	-	-	-	-	-	6.66276	6.68124	6.64345	6.66248	0.0188958	7.01703	7.07918	7.1271	7.07444	0.0551887	7.47712	7.5563	7.50515	7.51286	0.0401494
	10-1	-	-	-	-	-	-	-	-	-	-	-	-	-	-	-	7.10721	7.1271	7.07188	7.10207	0.0279685	7.20412	7.29226	7.38021	7.2922	0.0880456	7.5563	7.62325	7.57978	7.58645	0.0339669
	1-1	-	-	-	-	-	-	-	-	-	-	-	-	-	-	-	7.07918	7.10721	7.03342	7.07327	0.0372464	7.13988	7.1271	7.11394	7.12698	0.0129683	7.62325	7.66276	7.64345	7.64315	0.019756
	1-10	-	-	-	-	-	-	-	-	-	-	-	-	-	-	-	6.89763	6.89209	6.90309	6.8976	0.00549773	7.13354	7.08636	7.02531	7.08173	0.0542645	7.80618	7.5563	7.68124	7.68124	0.124939
	1-100	-	-	-	-	-	-	-	-	-	-	-	-	-	-	-	6.72439	6.716	6.73239	6.72426	0.00819598	6.88081	7.07918	7.51587	7.15862	0.324898	7.41497	7.3784	7.39967	7.39768	0.0183689
	B2-Y1	0	0	0	Mean	s.d.	3	3	3	Mean	s.d.	6	6	6	Mean	s.d.	8	8	8	Mean	s.d.	10	10	10	Mean	s.d.	14	14	14	Mean	s.d.
Y1 counting	100-1	-	-	-	-	-	-	-	-	-	-	-	-	-	-	-	6.83251	6.79239	6.74819	6.79103	0.0421769	6.86923	6.92428	6.90309	6.89887	0.0277657	6.92428	7.08636	6.85126	6.95397	0.120329
	10-1	-	-	-	-	-	-	-	-	-	-	-	-	-	-	-	6.97313	7.01703	7.04922	7.01313	0.0381952	7.01703	6.98227	6.97313	6.99081	0.023165	6.96379	7.08458	7.23045	7.09294	0.133527
	1-1	-	-	-	-	-	-	-	-	-	-	-	-	-	-	-	7.01703	7.01703	7.01703	7.01703	0	7.08636	6.80618	6.94939	6.94731	0.140102	7.03743	7.02938	6.95182	7.00621	0.0472728
	1-10	-	-	-	-	-	-	-	-	-	-	-	-	-	-	-	6.8451	6.83251	6.81954	6.83238	0.0127775	7.02531	7.02531	7.09342	7.04801	0.0393267	7.10721	7.1271	7.0086	7.08097	0.06346
	1-100	-	-	-	-	-	-	-	-	-	-	-	-	-	-	-	6.79239	6.83251	6.88366	6.83619	0.0457459	6.90309	6.96379	6.93197	6.93295	0.0303608	6.96379	6.91116	6.92428	6.93307	0.0273954
