# Supplementary material for: A systematic, complexity-reduction approach to dissect the kombucha tea microbiome
Source: eLife. 2022 Aug 11;11:e76401. doi: 10.7554/eLife.76401 (PMC9371603; doi:10.7554/eLife.76401)
Supplement: Figure 3—source data 2. [file elife-76401-fig3-data2.xlsx]

## Sheet: Sheet1
B2-Y1		100-1	100-1	100-1	Mean	s.d	10-1	10-1	10-1	Mean	s.d	1-1	1-1	1-1	Mean	s.d	1-10	1-10	1-10	Mean	s.d	1-100	1-100	1-100	Mean	s.d
pH	0	5.12	5.07	5.08	5.09	0.0264575	5.11	5.08	5.08	5.09	0.0173205	5.1	5.08	5.09	5.09	0.01	5.12	5.09	5.06	5.09	0.03	5.12	5.09	5.06	5.09	0.03
	3	4.22	4.21	4.17	4.2	0.0264575	4.22	4.25	4.21	4.22667	0.0208167	4.12	4.16	4.1	4.12667	0.0305505	4.21	4.15	4.13	4.16333	0.0416333	4.12	4.16	4.17	4.15	0.0264575
	6	3.56	3.57	3.64	3.59	0.043589	3.52	3.57	3.68	3.59	0.0818535	3.57	3.6	3.59	3.58667	0.0152753	3.63	3.64	3.63	3.63333	0.0057735	3.61	3.59	3.62	3.60667	0.0152753
	10	3.36	3.55	3.57	3.49333	0.115902	3.52	3.52	3.5	3.51333	0.011547	3.37	3.62	3.39	3.46	0.138924	3.58	3.56	3.53	3.55667	0.0251661	3.58	3.57	3.56	3.57	0.01
		100-1	100-1	100-1	Mean	s.d	10-1	10-1	10-1	Mean	s.d	1-1	1-1	1-1	Mean	s.d	1-10	1-10	1-10	Mean	s.d	1-100	1-100	1-100	Mean	s.d
Sucrose	0	52.0265	51.9867	51.9868	52	0.0229497	52.0265	51.9867	51.9868	52	0.0229497	52.0265	51.9867	51.9868	52	0.0229497	52.0265	51.9867	51.9868	52	0.0229497	52.0265	51.9867	51.9868	52	0.0229497
	3	52.9827	45.6198	51.3131	49.9719	3.86033	39.8641	50.9853	47.1837	46.0111	5.65258	47.8776	45.6423	44.0273	45.8491	1.93346	48.1703	42.4873	45.1281	45.2619	2.8439	48.7945	47.9082	41.3027	46.0018	4.09361
	6	39.9018	37.9969	36.5231	38.1406	1.69391	40.7577	35.5938	38.9908	38.4474	2.62448	40.4076	32.1598	37.5845	36.7173	4.19171	34.4146	37.4963	30.9837	34.2982	3.25785	35.5793	30.4754	35.9932	34.016	3.07317
	10	34.626	30.0485	29.3853	31.3532	2.85361	35.6621	33.1787	30.7097	33.1835	2.47621	26.9033	32.594	29.6096	29.7023	2.84647	30.3226	27.8715	25.7819	27.992	2.27274	30.0796	23.1874	31.2294	28.1655	4.34926
		100-1	100-1	100-1	Mean	s.d	10-1	10-1	10-1	Mean	s.d	1-1	1-1	1-1	Mean	s.d	1-10	1-10	1-10	Mean	s.d	1-100	1-100	1-100	Mean	s.d
Glucose	0	0	0	0	0	0	0	0	0	0	0	0	0	0	0	0	0		0	0	0	0	0	0	0	0
	3	0.134102	0.13531	0.135588	0.135	0.000789698	0.120837	0.151826	0.118672	0.130445	0.0185477	0.132465	0.141766	0.0430703	0.105767	0.0544957	0.009183	0.012312	0.008505	0.01	0.00203075	0	0	0	0	0
	6	0	0	0	0	0	0	0	0	0	0	0	0	0	0	0	0.15542	0.124321	0.094425	0.124722	0.0304995	0.113573	0.102341	0.125543	0.113819	0.0116032
	10	0.028932	0.0289354	0.0288326	0.0289	5.83949e-05	0.03425	0.03421	0.02988	0.03278	0.00251155	0.025432	0.02509	0.0293029	0.0266083	0.00233985	0.0191929	0.018231	0.019163	0.0188623	0.000546925	0.01342	0.0156	0.0178019	0.0156073	0.00219096
		100-1	100-1	100-1	Mean	s.d	10-1	10-1	10-1	Mean	s.d	1-1	1-1	1-1	Mean	s.d	1-10	1-10	1-10	Mean	s.d	1-100	1-100	1-100	Mean	s.d
Fructose	0	0	0	0	0	0	0	0	0	0	0	0	0	0	0	0	0	0	0	0	0	0	0	0	0	0
	3	2.21426	1.9931	1.62344	1.9436	0.298508	2.02526	2.01561	1.67389	1.90492	0.200136	1.92465	2.06776	1.66493	1.88578	0.204213	2.35463	2.35782	2.3509	2.35445	0.00346489	2.30834	2.27823	2.24101	2.27586	0.0337295
	6	0.35561	0.256532	0.32501	0.312384	0.0507314	0.332387	0.33425	0.330515	0.332384	0.0018675	0.32342	0.34216	0.301572	0.322384	0.0203138	0.37256	0.37109	0.380375	0.374675	0.00499076	0.280573	0.262341	0.184886	0.2426	0.0508059
	10	0.261893	0.27423	0.254347	0.26349	0.0100373	0.18876	0.18845	0.189208	0.188806	0.000381088	0.129864	0.15154	0.107189	0.129531	0.0221774	0.04213	0.04123	0.0454423	0.0429341	0.00221829	0	0	0	0	0
		100-1	100-1	100-1	Mean	s.d	10-1	10-1	10-1	Mean	s.d	1-1	1-1	1-1	Mean	s.d	1-10	1-10	1-10	Mean	s.d	1-100	1-100	1-100	Mean	s.d
Ethanol	0	0	0	0	0	0	0	0	0	0	0	0	0	0	0	0	0	0	0	0	0	0	0	0	0	0
	3	2.82375	2.34818	3.92457	3.03216	0.808601	1.61927	1.60173	1.69168	1.63756	0.0476847	1.89276	1.89324	1.77858	1.85486	0.0660605	2.07787	2.07897	2.06673	2.07452	0.0067748	2.54125	2.56311	1.77278	2.29238	0.450121
	6	5.67321	5.10232	4.33021	5.03525	0.674008	5.18262	5.54794	4.75391	5.16149	0.397435	7.34213	7.04986	5.98786	6.79329	0.712663	7.14236	7.10273	6.54174	6.92894	0.335916	7.00391	6.87321	6.61299	6.83004	0.199003
	10	8.03512	7.91035	7.95727	7.96758	0.0630216	9.02013	8.04521	8.95432	8.67322	0.544866	11.0352	10.9828	9.82502	10.6143	0.684057	9.07422	9.42521	8.30334	8.93426	0.573883	10.9561	10.0234	9.72788	10.2358	0.641072
		100-1	100-1	100-1	Mean	s.d	10-1	10-1	10-1	Mean	s.d	1-1	1-1	1-1	Mean	s.d	1-10	1-10	1-10	Mean	s.d	1-100	1-100	1-100	Mean	s.d
Acetate	0	0	0	0	0	0	0	0	0	0	0	0	0	0	0	0	0	0	0	0	0	0	0	0	0	0
	3	0	0.056421	0.090846	0.049089	0.0458647	0.514272	0.576212	0.318546	0.469677	0.134497	0.572165	0.654531	0.461204	0.562633	0.0970154	1.01892	0.993889	0.693717	0.902176	0.180964	0.102983	0	0.30051	0.134498	0.152714
	6	1.76936	1.71029	1.41854	1.63273	0.187831	2.43533	2.34123	2.09489	2.29048	0.175805	2.37728	2.23471	1.68216	2.09805	0.367153	2.14425	2.23673	1.83317	2.07138	0.211422	2.15526	2.14325	1.79487	2.03113	0.204692
	10	3.60287	3.71023	3.46288	3.592	0.124034	3.52902	3.51292	3.21686	3.4196	0.175763	3.29115	3.22094	3.13044	3.21417	0.0805675	2.80499	2.99028	3.18918	2.99482	0.192135	3.15955	3.00892	2.90076	3.02308	0.12997
		100-1	100-1	100-1	Mean	s.d	10-1	10-1	10-1	Mean	s.d	1-1	1-1	1-1	Mean	s.d	1-10	1-10	1-10	Mean	s.d	1-100	1-100	1-100	Mean	s.d
Polyphenol	0	45.9224	45.9264	45.9307	45.9265	0.00414332	45.9224	45.9264	45.9307	45.9265	0.00414332	45.9224	45.9264	45.9307	45.9265	0.00414332	45.9224	45.9264	45.9307	45.9265	0.00414332	45.9224	45.9264	45.7506	45.8665	0.100392
	3	46.2761	46.2192	43.3027	45.266	1.70051	47.8386	47.2082	46.1552	47.0674	0.850488	50.8074	50.0224	54.783	51.871	2.55229	43.1871	42.0843	41.5199	42.2638	0.847954	47.8703	47.1529	46.1789	47.0674	0.848911
	6	48.8676	48.8686	48.8699	48.8687	0.00115637	40.4625	40.4605	40.4643	40.4624	0.00192061	39.2642	39.2624	39.2579	39.2615	0.003245	52.578	52.1086	50.9262	51.871	0.851162	42.0826	41.6966	44.8134	42.8642	1.69901
	10	46.4701	48.1623	44.7683	46.4669	1.69702	34.8228	33.5226	33.2269	33.8575	0.849009	39.2623	39.2626	39.2596	39.2615	0.00168677	37.2641	36.7282	38.3881	37.4602	0.847147	47.068	47.3823	41.3477	45.266	3.39696
		100-1	100-1	100-1	Mean	s.d	10-1	10-1	10-1	Mean	s.d	1-1	1-1	1-1	Mean	s.d	1-10	1-10	1-10	Mean	s.d	1-100	1-100	1-100	Mean	s.d
Flavnoids	0	110.512	110.77	110.36	110.547	0.207484	110.512	110.77	110.36	110.547	0.207484	110.512	110.77	110.36	110.547	0.207484	110.512	110.77	110.36	110.547	0.207484	110.512	110.77	110.36	110.547	0.207484
	3	114.347	116.765	105.907	112.34	5.70014	116.553	115.783	101.547	111.294	8.45036	104.942	104.425	92.2539	100.54	7.18094	115.115	117.488	108.896	113.833	4.43718	107.236	108.347	116.507	110.697	5.06247
	6	81.3524	79.4588	81.2151	80.6754	1.05587	100.998	100.293	98.5375	99.9429	1.26719	101	101.461	101.849	101.436	0.424841	83.4283	83.7449	84.2628	83.812	0.42126	86.4994	86.3286	85.3292	86.0524	0.632114
	10	82.388	82.5642	76.626	80.5261	3.37871	72.3862	74.5229	68.6805	71.8632	2.95611	78.3682	76.4652	73.7505	76.1946	2.3207	60.8386	61.4725	65.4975	62.6029	2.5268	62.4725	63.2824	58.9172	61.5574	2.32202
