# Supplementary material for: A systematic, complexity-reduction approach to dissect the kombucha tea microbiome
Source: eLife. 2022 Aug 11;11:e76401. doi: 10.7554/eLife.76401 (PMC9371603; doi:10.7554/eLife.76401)
Supplement: Figure 4—source data 1. [file elife-76401-fig4-data1.xlsx]

## Sheet: Sheet1
Panel: 1		log
Sucrose		counting			mean	sd	pH			mean	sd	surcrose			mean	sd	glucose			mean	sd	fructose			mean	sd	ethanol			mean	sd	acetate			mean	sd
B	0	6.30103	6.30103	6.30103	6.30103	6.28037e-16	5.2	5.12	5.04	5.12	0.08	10.2927	10.3807	10.3912	10.3549	0.054054	0	0	0	0	0	0	0	0	0	0	0	0	0	0	0	0	0	0	0	0
	2	4.64345	4.66276	4.64738	4.6512	0.0102023	4.92	5	5.08	5	0.08	10.1034	9.2461	10.0796	9.80969	0.488235	0	0	0	0	0	0	0	0	0	0	0	0	0	0	0	0	0	0	0	0
	4	-	-	-	-	-	4.87	4.96	5.02	4.95	0.0754983	10.0102	10.5007	9.68121	10.064	0.41237	0	0	0	0	0	0	0	0	0	0	0	0	0	0	0	0	0	0	0	0
	6	-	-	-	-	-	4.91	4.99	4.83	4.91	0.08	9.83562	9.87067	8.78618	9.49749	0.616262	0	0	0	0	0	0	0	0	0	0	0	0	0	0	0	0	0	0	0	0
	8	-	-	-	-	-	4.83	4.89	4.77	4.83	0.06	10.0616	9.88067	9.4089	9.78373	0.336985	0	0	0	0	0	0	0	0	0	0	0	0	0	0	0	0	0	0	0	0
	10	-	-	-	-	-	4.81	4.82	4.8	4.81	0.01	10.1928	10.4692	8.63831	9.76676	0.986995	0	0	0	0	0	0	0	0	0	0	0	0	0	0	0	0	0	0	0	0
16
Sucrose		counting			mean	sd	pH			mean	sd	surcrose			mean	sd	glucose			mean	sd	fructose			mean	sd	ethanol			mean	sd	acetate			mean	sd
Y	0	6.30103	6.30103	6.30103	6.30103	6.28037e-16	5.09	5.09	5.09	5.09	0	9.82563	9.87562	9.72784	9.8097	0.0751701	0	0	0	0	0	0	0	0	0	0	0	0	0	0	0	0	0	0	0	0
	2	7.07918	7.12385	7.08636	7.09646	0.0239882	4.63	4.64	4.63	4.63333	0.0057735	7.9086	8.03607	7.32926	7.75798	0.376712	0	0	0	0	0	0.76542	0.76856	0.751252	0.761744	0.00922077	0.96283	0.9625	0.958885	0.961405	0.00218861	0.38138	0.18671	0.0106955	0.192928	0.18542
	4	7.68574	7.57978	7.5966	7.62071	0.0569453	4.2	4.2	4.21	4.20333	0.0057735	4.96832	4.78006	5.1864	4.97826	0.203352	0	0	0	0	0	0.01284	0.40675	0.702736	0.374109	0.346105	2.23432	2.25683	2.17479	2.22198	0.0423892	0.09522	0.08606	0.102625	0.094635	0.00829798
	6	7.73078	7.73239	7.65801	7.70706	0.0424871	4.09	4.1	4.09	4.09333	0.0057735	3.25623	3.03468	2.81425	3.03505	0.220988	0	0	0	0	0	0.387682	0.38928	0.335048	0.37067	0.0308602	3.12843	3.11307	2.90426	3.04859	0.125229	0.23392	0.26462	0.197919	0.232153	0.0333856
	8	7.716	7.716	7.6902	7.7074	0.0148998	4.06	4.06	4.05	4.05667	0.0057735	1.78632	1.69806	1.2513	1.57856	0.286831	0	0	0	0	0	0	0	0	0	0	3.49068	3.62283	3.42267	3.51206	0.101778	0.09692	0.1046	0.120056	0.107192	0.0117838
	10	7.69897	7.78533	7.77815	7.75415	0.0479222	3.97	3.96	3.98	3.97	0.01	0.688542	0.695634	0.640302	0.674826	0.0301082	0	0	0	0	0	0	0	0	0	0	4.50362	4.50953	4.21991	4.41102	0.165532	0.30881	0.46496	0.315371	0.363047	0.0883202
2
Glucose		counting			mean	sd	pH			mean	sd	surcrose			mean	sd	glucose			mean	sd	fructose			mean	sd	ethanol			mean	sd	acetate			mean	sd
B	0	6.30103	6.30103	6.30103	6.30103	6.28037e-16	5.2	5.12	4.95	5.09	0.127671	0	0	0	0	0	10.7956	10.8385	9.97606	10.5367	0.486011	0	0	0	0	0	0	0	0	0	0	0	0	0	0	0
	2	6.79239	6.76343	6.76343	6.77308	0.0167222	4.3	4.35	4.37	4.34	0.0360555	0	0	0	0	0	8.77113	8.57228	8.8931	8.7455	0.16194	0	0	0	0	0	0	0	0	0	0	0	0	0	0	0
	4	7.06819	7.00432	6.77815	6.95022	0.152398	3.86	3.85	3.81	3.84	0.0264575	0	0	0	0	0	7.93099	7.32985	8.03948	7.76677	0.382257	0	0	0	0	0	0	0	0	0	0	0	0	0	0	0
	6	7.10721	7.1038	7.32634	7.17912	0.127507	3.65	3.66	3.64	3.65	0.01	0	0	0	0	0	7.02555	7.07804	7.00605	7.03655	0.0372356	0	0	0	0	0	0	0	0	0	0	0	0	0	0	0
	8	7.13988	7.09342	7.17319	7.1355	0.0400625	3.63	3.63	3.62	3.62667	0.0057735	0	0	0	0	0	7.35277	7.34714	6.23372	6.97788	0.644468	0	0	0	0	0	0	0	0	0	0	0	0	0	0	0
	10	7.13033	7.02531	7.17026	7.10863	0.0748747	3.53	3.52	3.52	3.52333	0.0057735	0	0	0	0	0	7.19866	6.99392	6.61347	6.93535	0.296959	0	0	0	0	0	0	0	0	0	0	0	0	0	0	0
17
Glucose		counting			mean	sd	pH			mean	sd	surcrose			mean	sd	glucose			mean	sd	fructose			mean	sd	ethanol			mean	sd	acetate			mean	sd
Y	0	6.30103	6.30103	6.30103	6.30103	0	5.01	5	4.99	5	0.01	0	0	0	0	0	10.7956	10.8385	9.97606	10.5367	0.486011	0	0	0	0	0	0	0	0	0	0	0	0	0	0	0
	2	7.17026	6.97772	7.12057	7.08952	0.099955	4.49	4.49	4.49	4.49	0	0	0	0	0	0	7.21384	7.24028	7.42378	7.29263	0.114342	0	0	0	0	0	1.25097	1.63244	2.25167	1.71169	0.505038	0.15238	0.15982	0.157006	0.156402	0.0037566
	4	7.73239	7.77085	7.76343	7.75556	0.0204013	4.47	4.44	3	3.97	0.840179	0	0	0	0	0	4.65551	4.51534	5.03391	4.73492	0.26825	0	0	0	0	0	1.76834	1.64456	1.57016	1.66102	0.10011	0	0	0	0	0
	6	7.76343	7.77085	7.77815	7.77081	0.00736172	4.67	4.69	3.19	4.18333	0.86031	0	0	0	0	0	3.37957	3.13193	2.99611	3.1692	0.194426	0	0	0	0	0	2.62173	2.38858	2.44379	2.4847	0.12184	0	0	0	0	0
	8	7.74819	7.716	7.75587	7.74002	0.0211529	3.94	3.95	3.92	3.93667	0.0152753	0	0	0	0	0	1.64014	1.48095	1.20474	1.44194	0.220303	0	0	0	0	0	2.86013	2.86194	2.87154	2.86454	0.00612936	0.09692	0.1046	0.104036	0.101852	0.00428054
	10	7.77815	7.70757	7.75587	7.7472	0.0360815	3.97	3.96	3.77	3.9	0.112694	0	0	0	0	0	0.56592	0.55529	0.58195	0.56772	0.0134208	0	0	0	0	0	3.21804	3.10187	3.16014	3.16002	0.0580851	0.50881	0.56496	0.488783	0.520851	0.0394902
3
Fructose		counting			mean	sd	pH			mean	sd	surcrose			mean	sd	glucose			mean	sd	fructose			mean	sd	ethanol			mean	sd	acetate			mean	sd
B	0	6.30103	6.30103	6.30103	6.30103	6.28037e-16	5.1	5.09	5.08	5.09	0.01	0	0	0	0	0	0	0	0	0	0	10.2692	10.1322	10.0681	10.1565	0.102696	0	0	0	0	0	0	0	0	0	0
	2	6.03342	5.96379	5.96848	5.98856	0.0389198	4.95	4.95	4.95	4.95	1.25607e-15	0	0	0	0	0	0	0	0	0	0	10.2849	10.247	10.1206	10.2175	0.0860085	0	0	0	0	0	0	0	0	0	0
	4	-	-	-	-	-	4.75	4.85	4.92	4.84	0.08544	0	0	0	0	0	0	0	0	0	0	10.626	10.9592	8.19912	9.92809	1.50657	0	0	0	0	0	0	0	0	0	0
	6	-	-	-	-	-	4.92	4.8	4.86	4.86	0.06	0	0	0	0	0	0	0	0	0	0	10.2938	10.2256	10.2101	10.2432	0.0445181	0	0	0	0	0	0	0	0	0	0
	8	-	-	-	-	-	4.86	4.89	4.8	4.85	0.0458258	0	0	0	0	0	0	0	0	0	0	10.1448	10.1711	9.68734	10.0011	0.27204	0	0	0	0	0	0	0	0	0	0
	10	-	-	-	-	-	4.81	4.82	4.73	4.78667	0.0493288	0	0	0	0	0	0	0	0	0	0	10.3169	10.1989	9.89798	10.1379	0.216009	0	0	0	0	0	0	0	0	0	0
18
Fructose		counting			mean	sd	pH			mean	sd	surcrose			mean	sd	glucose			mean	sd	fructose			mean	sd	ethanol			mean	sd	acetate			mean	sd
Y	0	6.30103	6.30103	6.30103	6.30103	0	5.01	5	4.99	5	0.01	0	0	0	0	0	0	0	0	0	0	10.0259	10.0394	9.80428	9.95652	0.132017	0	0	0	0	0	0	0	0	0	0
	2	7.02531	7.13988	7.05308	7.07275	0.0597672	4.49	4.51	4.5	4.5	0.01	0	0	0	0	0	0	0	0	0	0	7.87436	7.52326	7.25101	7.54954	0.312503	1.60683	1.52769	0.98178	1.3721	0.340335	0.35289	0.3903	0.426141	0.389777	0.0366283
	4	7.716	7.76343	7.6902	7.72321	0.0371439	4.07	4.11	4.09	4.09	0.02	0	0	0	0	0	0	0	0	0	0	4.43625	4.87078	4.39351	4.56685	0.264079	1.6234	1.6361	1.24414	1.50121	0.22272	0.25224	0.26213	0.244794	0.253055	0.0086969
	6	7.69897	7.64345	7.64345	7.66196	0.0320529	4.01	3.93	3.805	3.915	0.10332	0	0	0	0	0	0	0	0	0	0	3.06977	3.0419	3.09428	3.06865	0.0262102	2.32329	2.25239	2.09669	2.22412	0.115912	0.14344	0.16759	0.196391	0.16914	0.0265098
	8	7.70757	7.6721	7.65321	7.67763	0.0275974	3.94	3.95	3.9	3.93	0.0264575	0	0	0	0	0	0	0	0	0	0	1.44459	1.71184	0.920381	1.35894	0.402622	2.97157	2.83004	2.60328	2.80163	0.185781	0	0	0	0	0
	10	7.65321	7.65321	7.65321	7.65321	0	3.89	3.9	3.87	3.88667	0.0152753	0	0	0	0	0	0	0	0	0	0	0.53594	0.5277	0.513289	0.525643	0.0114647	2.92808	2.99116	2.99852	2.97259	0.0387175	0.46539	0.41172	0.458987	0.445366	0.0293132
4
Ethanol		counting			mean	sd	pH			mean	sd	surcrose			mean	sd	glucose			mean	sd	fructose			mean	sd	ethanol			mean	sd	acetate			mean	sd
B	0	6.30103	6.30103	6.30103	6.30103	6.28037e-16	5.1	5.1	5.1	5.1	0	0	0	0	0	0	0	0	0	0	0	0	0	0	0	0	3.77124	3.74077	3.80001	3.77067	0.0296265	0.37469	0.18727	0.302253	0.288071	0.0945114
	2	4.69897	4.74036	4.73239	4.72391	0.0219621	4.97	4.97	4.97	4.97	1.25607e-15	0	0	0	0	0	0	0	0	0	0	0	0	0	0	0	3.70036	3.73969	3.7339	3.72465	0.021234	0.35797	0.35949	0.112553	0.276671	0.142132
	4	3.30103	4.90309	3.54407	3.91606	0.863385	4.81	4.85	4.89	4.85	0.04	0	0	0	0	0	0	0	0	0	0	0	0	0	0	0	3.84106	3.80579	4.01829	3.88838	0.113879	0.2952	0.32047	0.285785	0.300485	0.0179363
	6	-	-	-	-	-	5.42	5.49	3.37	4.76	1.20428	0	0	0	0	0	0	0	0	0	0	0	0	0	0	0	3.48234	3.48823	3.43943	3.47	0.0266371	0.39535	0.44634	0.429482	0.423724	0.0259781
	8	-	-	-	-	-	4.7	4.71	4.69	4.7	0.01	0	0	0	0	0	0	0	0	0	0	0	0	0	0	0	3.67205	3.62887	3.56503	3.62199	0.0538387	0.45849	0.47539	0.32972	0.4212	0.0796734
	10	-	-	-	-	-	4.99	4.98	4.06	4.67667	0.534072	0	0	0	0	0	0	0	0	0	0	0	0	0	0	0	3.59862	3.52799	3.62896	3.58519	0.0518074	0.3636	0.2882	0.2482	0.3	0.058598
19
Ethanol		counting			mean	sd	pH			mean	sd	surcrose			mean	sd	glucose			mean	sd	fructose			mean	sd	ethanol			mean	sd	acetate			mean	sd
Y	0	6.30103	6.30103	6.30103	6.30103	0	5.01	5	4.99	5	0.01	0	0	0	0	0	0	0	0	0	0	0	0	0	0	0	4.52006	4.29109	3.9909	4.26735	0.265376	0	0	0	0	0
	2	7.02531	7	6.98677	7.00403	0.01958	4.61	4.61	4.61	4.61	1.25607e-15	0	0	0	0	0	0	0	0	0	0	0	0	0	0	0	3.06141	3.00409	3.14633	3.07061	0.0715649	0.44239	0.13723	0.63946	0.40636	0.253046
	4	7.50515	7.41497	7.46389	7.46134	0.0451425	4.39	4.4	4.39	4.39333	0.0057735	0	0	0	0	0	0	0	0	0	0	0	0	0	0	0	2.89757	2.83484	2.76402	2.83214	0.0668133	0.19638	0.14908	0.227339	0.190933	0.0394128
	6	7.50515	7.41497	7.39794	7.43935	0.0576136	4.37	4.42	4.33	4.37333	0.0450925	0	0	0	0	0	0	0	0	0	0	0	0	0	0	0	3.51817	3.12814	2.44867	3.03166	0.541238	0.39659	0.31743	0.411317	0.375112	0.0504943
	8	7.26245	7.18184	7.14301	7.19577	0.0609238	4.24	4.26	4.19	4.23	0.0360555	0	0	0	0	0	0	0	0	0	0	0	0	0	0	0	3.01507	2.80134	3.0297	2.9487	0.127831	0.38291	0.40376	0.329057	0.371909	0.0385474
	10	7.20952	7.12057	6.97772	7.1026	0.116936	4.21	4.21	4.21	4.21	1.25607e-15	0	0	0	0	0	0	0	0	0	0	0	0	0	0	0	3.08179	2.89535	2.83304	2.93673	0.129436	0.59597	0.49118	0.452725	0.513292	0.0741384
5
Acetate		counting			mean	sd	pH			mean	sd	surcrose			mean	sd	glucose			mean	sd	fructose			mean	sd	ethanol			mean	sd	acetate			mean	sd
B	0	6.30103	6.30103	6.30103	6.30103	6.28037e-16	3.86	3.86	3.83	3.85	0.0173205	0	0	0	0	0	0	0	0	0	0	0	0	0	0	0	0	0	0	0	0	2.96806	2.80345	2.89195	2.88782	0.0823827
	2	-	-	-	-	-	3.8	3.79	3.78	3.79	0.01	0	0	0	0	0	0	0	0	0	0	0	0	0	0	0	0.20738	0.20358	0.216742	0.209234	0.00677403	3.08972	2.86333	3.06642	3.00649	0.124526
	4	-	-	-	-	-	3.79	3.79	3.76	3.78	0.0173205	0	0	0	0	0	0	0	0	0	0	0	0	0	0	0	0.12098	0.12061	0.11951	0.120367	0.000764893	3.01332	2.95237	2.5941	2.85326	0.226499
	6	-	-	-	-	-	3.82	3.78	3.83	3.81	0.0264575	0	0	0	0	0	0	0	0	0	0	0	0	0	0	0	0.11977	0.1134	0.12431	0.11916	0.00548052	3.08804	3.14479	3.26602	3.16628	0.0909186
	8	-	-	-	-	-	3.8	3.79	3.78	3.79	0.01	0	0	0	0	0	0	0	0	0	0	0	0	0	0	0	0	0	0	0	0	3.23208	3.28756	3.22643	3.24869	0.0337807
	10	-	-	-	-	-	3.81	3.8	3.8	3.80333	0.0057735	0	0	0	0	0	0	0	0	0	0	0	0	0	0	0	0.01749	0.0098711	0.00822265	0.0118612	0.00494383	2.91409	2.96679	3.04739	2.97609	0.0671349
20
Acetate		counting			mean	sd	pH			mean	sd	surcrose			mean	sd	glucose			mean	sd	fructose			mean	sd	ethanol			mean	sd	acetate			mean	sd
Y	0	6.30103	6.30103	6.30103	6.30103	0	3.82	3.82	3.82	3.82	6.28037e-16	0	0	0	0	0	0	0	0	0	0	0	0	0	0	0	0	0	0	0	0	2.80345	2.95467	2.8982	2.88544	0.0764133
	2	6.72428	6.77815	6.71181	6.73808	0.0352599	3.76	3.75	3.74	3.75	0.01	0	0	0	0	0	0	0	0	0	0	0	0	0	0	0	0	0	0	0	0	2.97036	2.98237	2.98059	2.97777	0.00648275
	4	6.69897	6.5563	6.77815	6.67781	0.112428	3.75	3.74	3.7	3.73	0.0264575	0	0	0	0	0	0	0	0	0	0	0	0	0	0	0	0	0	0	0	0	2.93151	2.96187	2.90194	2.93178	0.0299654
	6	6.39445	6.27184	6.47276	6.37968	0.101268	3.7	3.76	3.61	3.69	0.0754983	0	0	0	0	0	0	0	0	0	0	0	0	0	0	0	0	0	0	0	0	2.88384	2.88422	2.90935	2.89247	0.0146197
	8	5.91908	5.86923	6.02531	5.93787	0.0797163	3.68	3.79	3.54	3.67	0.1253	0	0	0	0	0	0	0	0	0	0	0	0	0	0	0	0	0	0	0	0	2.93924	2.92615	2.90185	2.92241	0.0189703
	10	5.86923	5.75587	5.70757	5.77756	0.0829835	3.73	3.78	3.66	3.72333	0.0602771	0	0	0	0	0	0	0	0	0	0	0	0	0	0	0	0	0	0	0	0	2.53982	2.61927	2.75486	2.63799	0.108737
6
SE		counting			mean	sd	pH			mean	sd	surcrose			mean	sd	glucose			mean	sd	fructose			mean	sd	ethanol			mean	sd	acetate			mean	sd
B	0	6.30103	6.30103	6.30103	6.30103	6.28037e-16	5.13	5.12	5.14	5.13	0.01	10.2871	10.6228	10.2273	10.3791	0.213217	0	0	0	0	0	0	0	0	0	0	4.15752	4.13389	4.00859	4.1	0.0800402	0	0	0	0	0
	2	5.13988	5.13033	5.08991	5.12004	0.0265298	4.72	4.72	4.72	4.72	1.25607e-15	10.3655	10.6836	11.6709	10.9066	0.680709	0.48689	0.43345	0.457315	0.459218	0.0267708	0.69609	0.68252	0.66139	0.68	0.0174867	4.01673	4.12047	4.04178	4.05966	0.0541319	0	0	0	0	0
	4	5.76343	5.87506	5.6721	5.7702	0.101651	4.45	4.44	4.43	4.44	0.01	9.8327	10.1164	9.25205	9.73372	0.440599	0.35381	0.34354	0.378128	0.358493	0.0177629	0.72163	0.75097	0.7774	0.75	0.0278977	3.80291	3.98219	4.1651	3.9834	0.181098	0	0.011652	0.036348	0.016	0.01856
	6	6.59106	6.60206	6.57978	6.59097	0.0111385	4.38	4.39	4.37	4.38	0.01	10.0641	9.01969	9.47374	9.51919	0.523711	0.36769	0.62386	0.102716	0.364755	0.260585	0.63412	1.25896	0.649881	0.847654	0.356289	3.65606	3.60421	3.71886	3.65971	0.0574121	0.36267	0.36539	0.371284	0.366448	0.00440338
	8	6.8451	6.68124	6.61805	6.7148	0.117185	4.18	4.19	4.17	4.18	0.01	9.48048	9.50871	8.92258	9.30392	0.330552	0.37357	0.35551	0.344515	0.357865	0.0146701	0.90666	0.86225	0.654051	0.807654	0.134865	3.6557	3.70836	3.9448	3.76962	0.153978	0.73219	0.74789	0.643492	0.707857	0.0562918
	10	6.68124	6.716	6.66745	6.68823	0.0250189	4.07	4.08	4.06	4.07	0.01	9.23103	9.01404	9.11928	9.12145	0.108511	0.31245	0.33618	0.396355	0.348328	0.0432513	0.71228	0.78764	0.86304	0.787653	0.0753803	3.74539	3.60308	3.55974	3.63607	0.0971223	1.21955	1.17658	1.24137	1.2125	0.0329653
21
SE		counting			mean	sd	pH			mean	sd	surcrose			mean	sd	glucose			mean	sd	fructose			mean	sd	ethanol			mean	sd	acetate			mean	sd
Y	0	6.30103	6.30103	6.30103	6.30103	0	5.1	5.09	5.08	5.09	0.01	10.2871	10.6228	10.2273	10.3791	0.213217	0	0	0	0	0	0	0	0	0	0	3.36854	3.34321	3.28098	3.33091	0.0450573	0	0	0	0	0
	2	7.02119	6.98227	7.25042	7.08463	0.144894	4.61	4.61	4.61	4.61	1.25607e-15	7.82242	7.87247	7.74544	7.81344	0.0639907	0	0	0	0	0	0.35081	0.37517	0.389421	0.3718	0.0195246	3.71859	3.75157	3.69489	3.72168	0.028464	0.33212	0.34587	0.342688	0.340226	0.00719804
	4	7.65321	7.60206	7.56229	7.60586	0.0455785	4.2	4.3	4.12	4.20667	0.090185	5.59371	0.21373	10.7493	5.51892	5.26819	0.20982	0.20532	0.205572	0.206904	0.00252851	0.73044	0.72617	0.719343	0.725318	0.00559765	4.66855	4.62067	4.4361	4.57511	0.122743	0	0	0	0	0
	6	7.83251	7.83251	7.6721	7.77904	0.0926134	4.13	4.15	4.11	4.13	0.02	0.97801	0.41422	9.13212	3.50812	4.87868	0.10766	0.09962	0.0944486	0.100576	0.0066574	0.34753	0	0.593697	0.313742	0.298287	6.34668	5.56149	5.39512	5.76776	0.508209	0.40481	0.40343	0.41549	0.40791	0.00660064
	8	7.73239	7.68124	7.77452	7.72938	0.0467106	4.35	4.27	3.48	4.03333	0.480867	0.41644	0.50391	4.45256	1.79097	2.30542	0	0	0	0	0	0	0	0	0	0	5.90721	5.80663	5.76704	5.82696	0.0722626	0.31392	0.36434	0.421609	0.366623	0.0538808
	10	7.72428	7.8451	7.55023	7.70653	0.148233	4.38	3.67	3.83	3.96	0.372424	0.94657	0.24249	1.17662	0.78856	0.486698	0	0	0	0	0	0	0	0	0	0	7.41275	7.06183	6.80705	7.09388	0.304121	0.44282	0.46921	0.345483	0.419171	0.0651656
7
SA		counting			mean	sd	pH			mean	sd	surcrose			mean	sd	glucose			mean	sd	fructose			mean	sd	ethanol			mean	sd	acetate			mean	sd
B	0	6.30103	6.30103	6.30103	6.30103	6.28037e-16	3.88	3.93	3.86	3.89	0.0360555	10.9652	10.9384	10.8741	10.9259	0.0468467	0	0	0	0	0	0	0	0	0	0	0	0	0	0	0	1.94698	1.94283	1.95164	1.94715	0.00440746
	2	5.88874	5.13033	4.85733	5.29214	0.534402	3.72	3.78	3.69	3.73	0.0458258	10.64	10.2532	10.749	10.5474	0.260529	0	0	0	0	0	0	0	0	0	0	0	0	0	0	0	2.25965	2.20525	2.01518	2.16003	0.128359
	4	4.97313	4.83251	4.716	4.84055	0.128751	3.72	3.73	3.65	3.7	0.043589	10.6236	10.2452	10.7295	10.5328	0.254582	0	0	0	0	0	0	0	0	0	0	0	0	0	0	0	2.71772	2.68249	3.37146	2.92389	0.388007
	6	3.37658	3.37658	3.43933	3.3975	0.036232	3.7	3.72	3.68	3.7	0.02	10.0447	10.0592	10.1803	10.0947	0.0744313	0	0	0	0	0	0	0	0	0	0	0	0	0	0	0	2.18876	2.1148	3.25085	2.51814	0.635622
	8	3.11394	3.14613	3.17609	3.14539	0.0310806	3.72	3.72	3.69	3.71	0.0173205	10.9976	9.81317	11.8399	10.8835	1.01814	0	0	0	0	0	0	0	0	0	0	0	0	0	0	0	2.15955	2.20494	2.89568	2.42006	0.412524
	10	2.50379	2.62325	2.22789	2.45164	0.202774	3.71	3.72	3.69	3.70667	0.0152753	10.7179	9.40299	11.2252	10.4487	0.940449	0	0	0	0	0	0	0	0	0	0	0	0	0	0	0	2.64141	1.82745	2.78764	2.41883	0.517347
22
SA		counting			mean	sd	pH			mean	sd	surcrose			mean	sd	glucose			mean	sd	fructose			mean	sd	ethanol			mean	sd	acetate			mean	sd
Y	0	6.30103	6.30103	6.30103	6.30103	0	3.88	3.93	3.86	3.89	0.0360555	9.96423	9.92637	9.83994	9.91018	0.063707	0	0	0	0	0	0	0	0	0	0	0	0	0	0	0	2.97659	2.91273	2.97313	2.95415	0.0359125
	2	7.02531	7.23805	6.77085	7.0114	0.233907	3.62	3.68	3.68	3.66	0.034641	7.23224	7.9373	7.2665	7.47868	0.397546	0.69082	0.67132	0.61786	0.66	0.0377743	0.20356	0.21109	0.18535	0.2	0.0132341	0	0	0	0	0	2.62815	2.7304	2.78459	2.71438	0.0794409
	4	7.57978	7.61278	7.54407	7.57888	0.0343668	3.52	3.63	3.53	3.56	0.0608276	5.03596	5.01615	5.08898	5.04703	0.0376558	0	0	0	0	0	0	0	0	0	0	2.54805	2.55947	2.57206	2.55986	0.0120098	3.07402	3.18874	3.18814	3.1503	0.0660611
	6	7.716	7.75587	7.87506	7.78231	0.0827592	3.57	3.56	3.64	3.59	0.043589	3.05061	3.07541	3.0217	3.04924	0.0268812	0	0	0	0	0	0	0	0	0	0	3.72882	3.66029	3.88519	3.7581	0.115274	3.56696	3.58272	3.42659	3.52542	0.0859513
	8	7.74036	7.74036	7.68574	7.72216	0.0315354	3.52	3.58	3.55	3.55	0.03	1.45434	1.47917	1.41599	1.44983	0.0318275	0	0	0	0	0	0.28556	0.25675	0.27489	0.2724	0.0145655	3.86832	3.75327	4.25884	3.96014	0.265001	3.39412	3.37585	3.32496	3.36497	0.035842
	10	7.75587	7.77085	7.86332	7.79668	0.0581954	3.56	3.61	3.41	3.52667	0.104083	0.57982	0.51893	0.511825	0.536858	0.0373749	0	0	0	0	0	0.47553	0.46702	0.486434	0.476328	0.00973157	4.23366	4.36967	5.08562	4.56298	0.4577	3.72938	3.38024	3.25137	3.45366	0.247317
8
GF		counting			mean	sd	pH			mean	sd	surcrose			mean	sd	glucose			mean	sd	fructose			mean	sd	ethanol			mean	sd	acetate			mean	sd
B	0	6.30103	6.30103	6.30103	6.30103	6.28037e-16	5.01	5	4.99	5	0.01	0	0	0	0	0	10.7953	10.723	10.781	10.7665	0.0382879	9.86143	9.7015	8.62253	9.39515	0.67387	0	0	0	0	0	0	0	0	0	0
	2	6.74819	6.83251	6.65321	6.74464	0.0897009	4.51	4.51	4.51	4.51	0	0	0	0	0	0	8.97894	9.21421	7.81529	8.66948	0.749045	10.0375	9.97986	9.90686	9.97473	0.0654597	0	0	0	0	0	0	0	0	0	0
	4	7	6.96379	6.85733	6.94037	0.0741598	3.81	3.83	3.82	3.82	0.01	0	0	0	0	0	7.66051	7.68194	7.92957	7.75734	0.14954	9.74521	9.70713	9.93439	9.79558	0.121713	0	0	0	0	0	0	0	0	0	0
	6	7.12385	7.13988	7.09691	7.12021	0.0217143	3.7	3.58	3.52	3.6	0.0916515	0	0	0	0	0	7.24676	6.20501	6.63981	6.6972	0.52324	10.3655	10.1939	9.27562	9.94501	0.586027	0	0	0	0	0	0	0	0	0	0
	8	7.19312	7.13033	7.17609	7.16652	0.032472	3.6	3.58	3.65	3.61	0.0360555	0	0	0	0	0	6.83481	6.97434	7.05752	6.95555	0.112535	10.4697	10.2731	10.2531	10.3319	0.11971	0	0	0	0	0	0	0	0	0	0
	10	7.13033	7.05308	7.13988	7.10776	0.0475988	3.64	3.49	3.4	3.51	0.121244	0	0	0	0	0	6.49975	6.53593	6.33981	6.4585	0.104368	10.076	9.92475	9.82069	9.94049	0.128396	0	0	0	0	0	0	0	0	0	0
23
GF		counting			mean	sd	pH			mean	sd	surcrose			mean	sd	glucose			mean	sd	fructose			mean	sd	ethanol			mean	sd	acetate			mean	sd
Y	0	6.30103	6.30103	6.30103	6.30103	0	5.01	5	4.99	5	0.01	0	0	0	0	0	10.7953	10.723	10.781	10.7665	0.0382879	9.72562	9.7213	8.73854	9.39515	0.568645	0	0	0	0	0	0	0	0	0	0
	2	6.99123	7.22531	6.80821	7.00825	0.20907	4.58	4.58	4.58	4.58	0	0	0	0	0	0	8.83937	9.40675	7.4512	8.56577	1.00607	9.17587	9.16295	6.70208	8.34697	1.42453	1.32596	1.37658	1.42381	1.37545	0.0489348	0.45141	0.45742	0.452015	0.453615	0.00330908
	4	7.69897	7.87506	7.64345	7.73916	0.120922	4.09	4.12	4.1	4.10333	0.0152753	0	0	0	0	0	6.52359	6.28094	5.93182	6.24545	0.297477	7.52079	7.04663	6.95275	7.17339	0.304498	1.80879	1.92875	2.06376	1.93377	0.127556	0	0	0	0	0
	6	7.89209	7.81889	7.70757	7.80618	0.0929157	3.88	3.87	3.89	3.88	0.01	0	0	0	0	0	4.18396	4.08666	3.956	4.07554	0.114386	5.23603	5.31183	5.3459	5.29792	0.0562416	3.29678	3.23187	3.2449	3.25785	0.0343381	0	0	0	0	0
	8	7.86923	7.81823	7.67394	7.78713	0.10129	3.87	3.85	3.86	3.86	0.01	0	0	0	0	0	2.64269	2.61077	2.65347	2.63564	0.0222071	3.94596	3.95115	3.93105	3.94272	0.0104327	4.21983	4.31156	4.34593	4.29244	0.0651881	0	0	0	0	0
	10	7.83251	7.74819	7.63949	7.74006	0.0967675	3.82	3.78	3.8	3.8	0.02	0	0	0	0	0	1.44271	1.45168	1.40812	1.43417	0.0230015	2.57377	2.52017	2.47683	2.52359	0.0485604	5.29794	5.21489	5.35577	5.28953	0.0708176	0.72076	0.55827	0.443201	0.574077	0.139453
9
GE		counting			mean	sd	pH			mean	sd	surcrose			mean	sd	glucose			mean	sd	fructose			mean	sd	ethanol			mean	sd	acetate			mean	sd
B	0	6.30103	6.30103	6.30103	6.30103	6.28037e-16	5.12	5.11	5.04	5.09	0.043589	0	0	0	0	0	10.8689	10.6536	10.6731	10.7319	0.119045	0	0	0	0	0	3.53354	3.58512	3.48705	3.53524	0.0490595	0	0	0	0	0
	2	6.81954	6.78533	6.98227	6.86238	0.105227	4.43	4.44	4.45	4.44	0.01	0	0	0	0	0	9.34264	8.75258	8.68692	8.92738	0.361121	0	0	0	0	0	3.33277	3.38632	3.36452	3.3612	0.0269289	0.51216	0.51771	0.522945	0.517605	0.00539327
	4	7.02531	7.06446	7.07918	7.05632	0.0278455	4.19	4.16	4.15	4.16667	0.0208167	0	0	0	0	0	8.65055	8.49781	9.32307	8.82381	0.439063	0	0	0	0	0	2.6842	2.48365	3.41875	2.8622	0.492307	0.87688	0.94253	1.05578	0.958395	0.0904966
	6	7.06446	7.03342	7.09167	7.06318	0.0291425	3.88	3.89	3.75	3.84	0.0781025	0	0	0	0	0	7.77189	7.83238	8.02093	7.87507	0.129889	0	0	0	0	0	2.04627	2.10977	2.81243	2.32282	0.425202	2.34034	2.10559	2.1154	2.18711	0.132791
	8	7.1271	7.13354	7.05308	7.10457	0.0447124	3.5	3.47	3.38	3.45	0.06245	0	0	0	0	0	7.37504	7.35635	7.40224	7.37788	0.0230735	0	0	0	0	0	1.30895	1.42663	1.87985	1.53848	0.301437	2.89167	2.91805	3.19028	3	0.165314
	10	7.09691	7.07188	7.1271	7.09863	0.0276517	3.4	3.32	3.18	3.3	0.111355	0	0	0	0	0	6.85746	6.76572	6.88287	6.83535	0.0616252	0	0	0	0	0	1.08737	0.86721	1.27263	1.07574	0.202958	3.4883	3.60065	3.81244	3.6338	0.16459
24
GE		counting			mean	sd	pH			mean	sd	surcrose			mean	sd	glucose			mean	sd	fructose			mean	sd	ethanol			mean	sd	acetate			mean	sd
Y	0	6.30103	6.30103	6.30103	6.30103	0	5.01	5	5.2	5.07	0.112694	0	0	0	0	0	10.8689	10.6536	10.6731	10.7319	0.119045	0	0	0	0	0	3.53354	3.58512	3.48705	3.53524	0.0490595	0	0	0	0	0
	2	7.16435	7.11394	7.27416	7.18415	0.0819216	4.54	4.52	4.53	4.53	0.01	0	0	0	0	0	7.73752	7.6818	7.42083	7.61338	0.16907	0	0	0	0	0	4.05515	4.09147	4.19565	4.11409	0.0729302	0	0	0	0	0
	4	7.74819	7.77815	7.67669	7.73434	0.0521263	4.23	4.47	4.22	4.30667	0.141539	0	0	0	0	0	5.53669	5.75906	5.60784	5.63453	0.113562	0	0	0	0	0	5.16901	5.29873	5.5809	5.34954	0.210592	0	0	0	0	0
	6	7.81954	7.82607	7.77085	7.80549	0.0301748	4.12	4.32	4.11	4.18333	0.118462	0	0	0	0	0	3.29667	3.56085	3.8981	3.58521	0.301451	0	0	0	0	0	6.70295	6.73263	6.89197	6.77585	0.101652	0.39813	0.32663	0.254068	0.326276	0.0720317
	8	7.8451	7.8451	7.76716	7.81912	0.0449999	4.02	4.04	4.04	4.03333	0.011547	0	0	0	0	0	1.67992	0	1.93005	1.20332	1.04959	0	0	0	0	0	6.82005	6.79801	6.16024	6.59276	0.374744	0.29751	0.28312	0.315143	0.298591	0.0160388
	10	7.74036	7.83251	7.81291	7.79526	0.048543	3.98	3.99	3.94	3.97	0.0264575	0	0	0	0	0	0.60939	0.65038	0.673355	0.644375	0.0324026	0	0	0	0	0	7.57272	7.66196	6.96843	7.40104	0.377299	0.18301	0.15202	0.130462	0.155164	0.0264147
10
GA		counting			mean	sd	pH			mean	sd	surcrose			mean	sd	glucose			mean	sd	fructose			mean	sd	ethanol			mean	sd	acetate			mean	sd
B	0	6.30103	6.30103	6.30103	6.30103	6.28037e-16	3.93	3.92	3.91	3.92	0.01	0	0	0	0	0	10.1164	10.0456	9.90355	10.0219	0.108394	0	0	0	0	0	0	0	0	0	0	2.06004	2.04925	2.1086	2.07263	0.0316147
	2	6.94448	7.14922	6.54407	6.87926	0.307803	3.71	3.73	3.72	3.72	0.01	0	0	0	0	0	8.7289	8.65161	8.91739	8.76597	0.13671	0	0	0	0	0	0	0	0	0	0	2.53019	2.30995	2.07423	2.30479	0.228024
	4	6.96379	7.04922	7.07555	7.02952	0.0584261	3.63	3.65	3.55	3.61	0.052915	0	0	0	0	0	7.6845	7.59056	7.50252	7.59253	0.0910047	0	0	0	0	0	0	0	0	0	0	2.83929	2.68225	2.99702	2.83952	0.157385
	6	7.17026	7.17026	7.13354	7.15802	0.0212019	3.47	3.46	3.51	3.48	0.0264575	0	0	0	0	0	7.39023	7.20193	7.02226	7.20481	0.184004	0	0	0	0	0	0	0	0	0	0	3.24701	3.51961	3.74963	3.50542	0.251608
	8	6.95424	7.00432	7	6.98619	0.0277498	3.27	3.23	3.34	3.28	0.0556776	0	0	0	0	0	7.68109	7.50672	7.89708	7.69496	0.195552	0	0	0	0	0	0	0	0	0	0	3.51707	3.62805	3.46223	3.53578	0.0844769
	10	7.01703	7.0569	6.94939	7.00778	0.0543519	2.98	3.02	3.7	3.23333	0.40464	0	0	0	0	0	7.51703	7.37112	7.95859	7.61558	0.305883	0	0	0	0	0	0	0	0	0	0	3.91139	3.95667	3.89535	3.92114	0.0318003
25
GA		counting			mean	sd	pH			mean	sd	surcrose			mean	sd	glucose			mean	sd	fructose			mean	sd	ethanol			mean	sd	acetate			mean	sd
Y	0	6.30103	6.30103	6.30103	6.30103	0	3.86	3.87	3.88	3.87	0.01	0	0	0	0	0	10.0774	9.92801	9.97296	9.99278	0.0766272	0	0	0	0	0	0	0	0	0	0	2.72784	2.73607	2.69921	2.72104	0.019348
	2	6.69897	6.90849	7.50515	7.03754	0.418296	3.69	3.7	3.65	3.68	0.0264575	0	0	0	0	0	7.99983	7.68591	8.11728	7.93434	0.223017	0	0	0	0	0	1.34587	1.37016	1.29165	1.33589	0.0401918	2.74639	2.73855	2.86166	2.7822	0.0689259
	4	7.59106	7.63347	7.54407	7.58953	0.0447199	3.57	3.58	3.62	3.59	0.0264575	0	0	0	0	0	4.37644	4.70858	5.14307	4.7427	0.384449	0	0	0	0	0	3.25895	3.29712	3.11841	3.22483	0.0941177	3.02126	3.16921	2.97121	3.05389	0.102953
	6	7.77815	7.74036	7.78533	7.76795	0.0241576	3.56	3.58	3.6	3.58	0.02	0	0	0	0	0	3.42119	3.6234	3.2789	3.44116	0.173114	0.36506	0.47134	0.625276	0.487225	0.130834	4.4889	4.41737	4.32594	4.41074	0.0816849	3.17597	3.28872	3.0368	3.16716	0.126188
	8	7.60206	7.76343	7.716	7.69383	0.0829375	3.53	3.53	3.53	3.53	6.28037e-16	0	0	0	0	0	1.42504	1.58792	1.56375	1.52557	0.0878963	0.47551	0.49551	0.514519	0.49518	0.0195064	5.20855	5.27995	5.16838	5.21896	0.0565088	3.20377	3.20874	3.22269	3.21173	0.00981155
	10	7.80618	7.85733	7.71181	7.79177	0.0738246	3.51	3.53	3.55	3.53	0.02	0	0	0	0	0	0	0	0	0	0	0.52688	0.57868	0.4808	0.528787	0.0489681	5.96332	5.47218	5.3107	5.58207	0.339906	3.35602	3.49475	3.1479	3.33289	0.174578
11
FE		counting			mean	sd	pH			mean	sd	surcrose			mean	sd	glucose			mean	sd	fructose			mean	sd	ethanol			mean	sd	acetate			mean	sd
B	0	6.30103	6.30103	6.30103	6.30103	6.28037e-16	5.12	5.11	5.1	5.11	0.01	0	0	0	0	0	0	0	0	0	0	11.3214	11.3171	11.4223	11.3536	0.0595613	3.93595	3.95757	4.09955	3.99769	0.0888732	0	0	0	0	0
	2	4.69897	4.72428	4.21219	4.54514	0.288627	4.8	4.81	4.73	4.78	0.043589	0	0	0	0	0	0	0	0	0	0	10.385	10.3727	10.4266	10.3948	0.0282346	3.57924	3.6782	3.60601	3.62115	0.0511877	0	0	0	0	0
	4	4.83885	4.79239	4.80618	4.81247	0.0238596	4.69	4.7	4.71	4.7	0.01	0	0	0	0	0	0	0	0	0	0	11.1106	11.0236	10.8995	11.0112	0.106105	3.98473	3.8317	3.69034	3.83559	0.147234	0.03552	0.03546	0.0320055	0.0343285	0.002012
	6	5.83251	5.81954	5.78533	5.81246	0.024374	4.73	4.69	4.5	4.64	0.122882	0	0	0	0	0	0	0	0	0	0	10.3783	10.3694	10.3722	10.3733	0.0045473	3.54805	3.72476	3.83406	3.70229	0.144323	0.48385	0.44888	0.50745	0.48006	0.0294684
	8	6.50106	6.64345	6.38021	6.50824	0.131768	4.35	4.36	4.34	4.35	0.01	0	0	0	0	0	0	0	0	0	0	10.3785	9.64592	9.45724	9.82723	0.48667	3.45187	3.39246	3.54185	3.46206	0.0752145	0.68527	0.76765	0.840988	0.764636	0.0779027
	10	6.51455	6.47712	6.6902	6.56062	0.113764	4.54	4.22	3.6	4.12	0.477912	0	0	0	0	0	0	0	0	0	0	11.0411	10.0227	10.0482	10.3707	0.580761	3.39399	3.41356	3.6629	3.49015	0.149926	0.86467	0.84339	0.787849	0.83197	0.0396637
26
FE		counting			mean	sd	pH			mean	sd	surcrose			mean	sd	glucose			mean	sd	fructose			mean	sd	ethanol			mean	sd	acetate			mean	sd
Y	0	6.30103	6.30103	6.30103	6.30103	0	5.01	5.05	5.09	5.05	0.04	0	0	0	0	0	0	0	0	0	0	10.2891	10.2856	10.1153	10.23	0.0993696	3.32115	3.43116	3.61885	3.45705	0.150532	0	0	0	0	0
	2	7.07188	7.09342	7.13988	7.10173	0.0347511	4.29	4.42	5	4.57	0.378021	0	0	0	0	0	0	0	0	0	0	7.76298	7.64031	7.92709	7.77679	0.143887	4.03465	4.03189	4.11189	4.05947	0.0454094	0.29192	0.31443	0.44848	0.35161	0.0846435
	4	7.76343	7.74819	7.69897	7.73686	0.0336885	4.23	4.2	4.26	4.23	0.03	0	0	0	0	0	0	0	0	0	0	5.44341	5.68597	6.03797	5.72245	0.298956	5.74024	4.59745	4.92089	5.0862	0.589055	0	0	0	0	0
	6	7.72016	7.81954	7.64345	7.72772	0.0882887	4.03	4.02	4.16	4.07	0.0781025	0	0	0	0	0	0	0	0	0	0	3.55744	3.56657	4.33498	3.81966	0.446298	6.24812	6.53375	5.67059	6.15082	0.439729	0.24893	0.25369	0.306228	0.269616	0.0317961
	8	7.79239	7.73239	7.60206	7.70895	0.0973078	4.02	4.04	4.02	4.02667	0.011547	0	0	0	0	0	0	0	0	0	0	2.31163	2.6475	2.77154	2.57689	0.237945	5.69881	6.2919	6.36824	6.11965	0.366451	0.34209	0.28777	0.405809	0.345223	0.0590818
	10	7.79239	7.77085	7.62325	7.72883	0.0920685	3.98	3.99	3.99	3.98667	0.0057735	0	0	0	0	0	0	0	0	0	0	1.69763	1.63684	1.50997	1.61482	0.0957477	5.92866	6.09045	6.64068	6.21993	0.373252	0.12192	0.18493	0.076541	0.127797	0.054433
12
FA		counting			mean	sd	pH			mean	sd	surcrose			mean	sd	glucose			mean	sd	fructose			mean	sd	ethanol			mean	sd	acetate			mean	sd
B	0	6.30103	6.30103	6.30103	6.30103	6.28037e-16	3.89	3.88	3.81	3.86	0.043589	0	0	0	0	0	0	0	0	0	0	10.3255	10.3113	10.3621	10.333	0.0262433	0	0	0	0	0	2.03739	2.02509	1.94715	2.00321	0.0489374
	2	4.83251	5.20412	6.4014	5.47934	0.819857	3.78	3.79	3.71	3.76	0.043589	0	0	0	0	0	0	0	0	0	0	10.2808	10.5356	10.3072	10.3745	0.140098	0	0	0	0	0	2.68205	2.6228	2.70626	2.67037	0.0429384
	4	3.88081	4.07918	3.82607	3.92869	0.133172	3.73	3.71	3.75	3.73	0.02	0	0	0	0	0	0	0	0	0	0	9.76655	9.89548	9.76646	9.8095	0.0744652	0	0	0	0	0	0.10284	0.49888	7.28998	2.63057	4.04002
	6	2.4014	2.30103	2.19866	2.30036	0.101373	3.74	3.72	3.7	3.72	0.02	0	0	0	0	0	0	0	0	0	0	10.1778	10.2849	10.2977	10.2535	0.0658504	0	0	0	0	0	2.68197	2.51752	2.71424	2.63791	0.105502
	8	-	-	-	-	-	3.71	3.7	3.66	3.69	0.0264575	0	0	0	0	0	0	0	0	0	0	9.41402	10.0727	9.09887	9.52854	0.496931	0	0	0	0	0	2.56293	2.57254	2.54105	2.55884	0.0161385
	10	-	-	-	-	-	3.7	3.62	3.67	3.66333	0.0404145	0	0	0	0	0	0	0	0	0	0	9.83294	9.70069	10.4216	9.98507	0.383768	0	0	0	0	0	2.59379	2.48403	2.70584	2.59455	0.110909
27
FA		counting			mean	sd	pH			mean	sd	surcrose			mean	sd	glucose			mean	sd	fructose			mean	sd	ethanol			mean	sd	acetate			mean	sd
Y	0	6.30103	6.30103	6.30103	6.30103	0	3.89	3.88	3.81	3.86	0.043589	0	0	0	0	0	0	0	0	0	0	9.79319	9.76359	9.78181	9.77953	0.0149311	0	0	0	0	0	2.69846	2.7996	2.64265	2.71357	0.0795585
	2	6.64345	7	7.5563	7.06659	0.460053	3.7	3.64	3.7	3.68	0.034641	0	0	0	0	0	0	0	0	0	0	7.64118	7.72888	7.1584	7.50949	0.307199	0.98454	1.32184	0.926049	1.07748	0.213636	2.5723	2.46836	2.63646	2.55904	0.0848309
	4	7.57978	7.57978	7.60206	7.58721	0.0128613	3.56	3.58	3.51	3.55	0.0360555	0	0	0	0	0	0	0	0	0	0	5.65025	5.69851	4.8111	5.38662	0.498999	2.74764	2.61723	2.71018	2.69168	0.0671445	3.0035	3.1331	3.03902	3.05854	0.0669687
	6	7.69897	7.72428	7.60206	7.6751	0.0645092	3.54	3.52	3.68	3.58	0.087178	0	0	0	0	0	0	0	0	0	0	3.72431	3.16174	4.04546	3.64384	0.44732	3.27365	3.47736	3.69516	3.48206	0.210792	3.15085	3.10088	3.3187	3.19014	0.114105
	8	7.66276	7.66276	7.6902	7.6719	0.0158415	3.52	3.51	3.59	3.54	0.043589	0	0	0	0	0	0	0	0	0	0	2.27419	2.20922	1.78436	2.08926	0.266042	4.00525	3.90528	4.24738	4.05264	0.175901	3.21707	3.25177	3.29976	3.2562	0.0415226
	10	7.64345	7.69897	7.61278	7.65174	0.043686	3.52	3.53	3.55	3.53333	0.0152753	0	0	0	0	0	0	0	0	0	0	1.39933	1.55614	0.88141	1.27896	0.353103	4.484	4.09726	4.50939	4.36355	0.230963	3.35243	3.38662	3.4362	3.39175	0.04212
13
FGE		counting			mean	sd	pH			mean	sd	surcrose			mean	sd	glucose			mean	sd	fructose			mean	sd	ethanol			mean	sd	acetate			mean	sd
B	0	6.30103	6.30103	6.30103	6.30103	6.28037e-16	5.01	5	4.99	5	0.01	0	0	0	0	0	10.9308	10.9474	10.6906	10.8563	0.143689	9.90928	10.1353	9.85046	9.965	0.150359	3.59024	3.59669	3.5296	3.57218	0.0370161	0	0	0	0	0
	2	6.83251	6.96379	6.8451	6.88046	0.0724338	4.34	4.34	4.34	4.34	0	0	0	0	0	0	8.01723	8.11817	8.2736	8.13633	0.129149	10.448	10.2501	10.429	10.3757	0.109159	3.49728	3.60342	3.01392	3.37154	0.314222	0.29608	0.29844	0.283437	0.292652	0.00806719
	4	7.09061	7.10037	6.90849	7.03316	0.108078	3.92	3.93	3.94	3.93	0.01	0	0	0	0	0	7.94229	7.94007	7.8261	7.90282	0.0664507	10.1741	10.1259	10.1056	10.1352	0.035181	2.18137	2.15595	2.22715	2.18816	0.0360792	0.61467	0.57392	0.525549	0.57138	0.044615
	6	7.04922	7.03342	7.12385	7.06883	0.0482991	4.01	4.08	2.11	3.4	1.11772	0	0	0	0	0	6.73362	6.74692	6.74165	6.74073	0.00669756	10.0454	10.157	10.2191	10.1405	0.0880212	2.15528	2.02713	1.89253	2.02498	0.131388	1.18617	1.37976	1.33326	1.29973	0.101057
	8	7.08636	7.06446	7.07188	7.07423	0.0111386	3.6	3.42	2.79	3.27	0.425323	0	0	0	0	0	6.72965	6.70464	6.79721	6.74383	0.0478899	10.2576	10.1591	10.4899	10.3022	0.169887	1.05338	1.11287	0.840275	1.00218	0.14333	2.32697	2.37602	2.27024	2.32441	0.0529364
	10	7.13354	7.30103	7.07555	7.17004	0.117089	3.1	3.41	3.09	3.2	0.181934	0	0	0	0	0	6.85698	6.46087	6.45298	6.59028	0.231007	9.04182	9.02068	9.87256	9.31169	0.485844	0.57402	0.89157	1.13858	0.868055	0.283011	3.37458	3.28114	3.47247	3.37607	0.0956761
28
FGE		counting			mean	sd	pH			mean	sd	surcrose			mean	sd	glucose			mean	sd	fructose			mean	sd	ethanol			mean	sd	acetate			mean	sd
Y	0	6.30103	6.30103	6.30103	6.30103	0	5.01	5	4.99	5	0.01	0	0	0	0	0	10.8624	10.8077	10.8988	10.8563	0.0458742	9.98334	9.83338	10.0783	9.965	0.123481	3.20305	3.23214	3.38133	3.27217	0.0956477	0	0	0	0	0
	2	6.99123	7.02531	7.07188	7.02947	0.040489	4.58	4.58	4.49	4.55	0.0519615	0	0	0	0	0	8.19559	8.59196	9.80608	8.86454	0.839133	8.63673	8.41774	7.73299	8.26249	0.471447	4.41157	4.05871	4.48654	4.31894	0.228462	0.62815	1.06151	1.53347	1.07438	0.452797
	4	7.83251	7.89487	7.81954	7.84897	0.0402718	4.09	4.12	4.12	4.11	0.0173205	0	0	0	0	0	6.63127	6.44905	5.82735	6.30256	0.421509	7.84697	7.3148	7.10602	7.4226	0.382057	5.67478	5.58758	5.70534	5.6559	0.0611081	0	0	0	0	0
	6	7.80618	7.80618	7.716	7.77612	0.0520635	3.68	3.67	4.44	3.93	0.441701	0	0	0	0	0	4.19457	4.16091	4.16478	4.17342	0.0184184	5.60171	5.52276	5.67124	5.59857	0.0742913	7.84521	7.67652	7.76657	7.76277	0.0844093	0.12846	0.13489	0.0839405	0.115763	0.0277464
	8	7.74819	7.85733	7.86923	7.82492	0.0667154	3.87	3.85	3.82	3.84667	0.0251661	0	0	0	0	0	2.66496	2.68779	3.10423	2.81899	0.247289	4.2377	4.35646	4.32544	4.30653	0.0615955	8.89124	8.67474	8.69773	8.75457	0.118917	0.07282	0.07121	0.082923	0.075651	0.00634898
	10	7.716	7.74819	7.8451	7.76976	0.0671973	3.82	3.78	3.77	3.79	0.0264575	0	0	0	0	0	1.64028	1.69574	1.53784	1.62462	0.0801064	2.84922	2.82757	2.81416	2.83032	0.0176916	9.63788	9.61101	9.69163	9.64684	0.0410501	0	0	0	0	0
14
GEA		counting			mean	sd	pH			mean	sd	surcrose			mean	sd	glucose			mean	sd	fructose			mean	sd	ethanol			mean	sd	acetate			mean	sd
B	0	6.30103	6.30103	6.30103	6.30103	6.28037e-16	3.79	3.8	3.78	3.79	0.01	0	0	0	0	0	10.7077	10.7061	10.8059	10.7399	0.057172	0	0	0	0	0	3.83067	3.86031	3.96315	3.88471	0.0695288	2.5625	2.63745	2.80294	2.66763	0.123028
	2	7.21484	6.9345	6.47712	6.87549	0.372385	3.71	3.73	3.69	3.71	0.02	0	0	0	0	0	8.59659	8.62794	8.59273	8.60575	0.0193092	0	0	0	0	0	3.88553	3.95848	4.01328	3.95243	0.0640895	3.95776	3.81591	4.20464	3.99277	0.196716
	4	7.17026	7.10721	7.05308	7.11018	0.0586482	3.37	3.35	3.33	3.35	0.02	0	0	0	0	0	8.30219	8.32694	7.70874	8.11262	0.349989	0	0	0	0	0	3.81515	3.54938	4.09314	3.81922	0.271905	4.77179	4.22338	5.07963	4.6916	0.433721
	6	7.07918	7.04922	7.15229	7.09356	0.0530188	3.17	3.16	3.27	3.2	0.0608276	0	0	0	0	0	8.26259	7.80853	7.65908	7.91007	0.314306	0	0	0	0	0	2.11369	2.04957	1.12256	1.76194	0.554647	6.75153	6.18035	6.52588	6.48592	0.287679
	8	7.02531	7.01703	6.98227	7.0082	0.0228357	3.17	3.13	3	3.1	0.0888819	0	0	0	0	0	7.0358	7.03898	7.10522	7.06	0.0391939	0	0	0	0	0	1.91258	1.69032	1.33066	1.64452	0.293651	7.52577	7.1928	7.69934	7.47264	0.257414
	10	6.99123	7.07188	7.07004	7.04438	0.0460436	3.12	3.12	3.1	3.11	0.011547	0	0	0	0	0	6.6967	6.59587	6.50743	6.6	0.0947026	0	0	0	0	0	0.76685	0.77853	0.81562	0.787	0.0254644	7.55669	7.66703	7.80485	7.67619	0.124333
29
GEA		counting			mean	sd	pH			mean	sd	surcrose			mean	sd	glucose			mean	sd	fructose			mean	sd	ethanol			mean	sd	acetate			mean	sd
Y	0	6.30103	6.30103	6.30103	6.30103	0	3.79	3.8	3.78	3.79	0.01	0	0	0	0	0	9.10769	9.00608	9.24425	9.11934	0.119512	0	0	0	0	0	4.01976	4.00965	4.10928	4.04623	0.0548364	2.58935	2.50874	2.69615	2.59808	0.0940095
	2	6.57978	6.98227	7.38382	6.98196	0.402016	3.69	3.7	3.59	3.66	0.0608276	0	0	0	0	0	7.69659	7.62794	7.7308	7.68511	0.0523821	0	0	0	0	0	4.77558	4.76174	4.80932	4.78221	0.0244765	2.73591	2.76749	2.59686	2.70009	0.0907835
	4	7.5563	7.64345	7.75587	7.65188	0.100053	3.57	3.56	3.52	3.55	0.0264575	0	0	0	0	0	4.60219	4.72694	4.78022	4.70312	0.0913726	0	0	0	0	0	6.81762	6.5207	6.56696	6.63509	0.159755	2.94887	2.94115	3.10373	2.99792	0.0917154
	6	7.74819	7.73239	7.78533	7.7553	0.027176	3.56	3.58	3.63	3.59	0.0360555	0	0	0	0	0	3.52259	3.60853	3.38439	3.50517	0.113081	0	0	0	0	0	8.34676	8.26671	7.92246	8.17864	0.22544	3.13787	3.11795	3.31091	3.18891	0.106124
	8	7.77815	7.716	7.72428	7.73948	0.0337475	3.53	3.54	3.58	3.55	0.0264575	0	0	0	0	0	1.6258	1.63898	1.61224	1.62567	0.0133717	0	0	0	0	0	8.87061	8.91235	8.75912	8.84736	0.0792167	3.22873	3.27742	3.29201	3.26605	0.0331379
	10	7.76343	7.74819	7.77815	7.76326	0.0149824	3.52	3.53	3.52	3.52	0.0057735	0	0	0	0	0	0.01256	0.02587	0.02157	0.02	0.00679247	0	0	0	0	0	9.11326	9.16896	9.4359	9.23938	0.172463	3.33911	3.20689	3.54737	3.36445	0.171647
15
FEA		counting			mean	sd	pH			mean	sd	surcrose			mean	sd	glucose			mean	sd	fructose			mean	sd	ethanol			mean	sd	acetate			mean	sd
B	0	6.30103	6.30103	6.30103	6.30103	6.28037e-16	3.73	3.76	3.82	3.77	0.0458258	0	0	0	0	0	0	0	0	0	0	9.81597	10.0102	9.9923	9.9395	0.107355	0.9173	0.909	9.6175	3.8146	5.02546	2.63376	2.64854	2.56114	2.61448	0.0467812
	2	6.78888	6.50515	6.09342	6.46248	0.349685	3.72	3.73	3.83	3.76	0.0608276	0	0	0	0	0	0	0	0	0	0	8.96975	9.05711	9.83073	9.28586	0.473889	3.34679	3.63174	4.13966	3.70607	0.401629	2.87067	2.85271	2.90609	2.87649	0.0271617
	4	6.47712	6.11394	6.15017	6.24708	0.200046	3.72	3.72	3.69	3.71	0.0173205	0	0	0	0	0	0	0	0	0	0	9.78827	9.64814	10.1127	9.84972	0.238314	3.59812	3.53097	4.02374	3.71761	0.267234	3.3322	3.20334	3.23795	3.25783	0.0666906
	6	5.97313	5.90309	5.95424	5.94349	0.0362366	3.7	3.69	3.62	3.67	0.043589	0	0	0	0	0	0	0	0	0	0	9.07435	9.13568	9.13599	9.11534	0.0354996	3.94958	3.74451	3.51282	3.73564	0.218518	3.40269	3.5815	3.47	3.48473	0.0903105
	8	5.48287	5.53148	5.49831	5.50422	0.0248359	3.62	3.64	3.66	3.64	0.02	0	0	0	0	0	0	0	0	0	0	9.45873	9.51071	8.52469	9.16471	0.554883	3.39246	3.32846	4.25112	3.65735	0.515215	3.55057	3.6805	3.8978	3.70962	0.175439
	10	4.77815	4.74819	4.5302	4.68551	0.135337	3.63	3.64	3.59	3.62	0.0264575	0	0	0	0	0	0	0	0	0	0	9.71844	9.72552	8.62775	9.35723	0.631767	3.86773	4.11822	3.19085	3.7256	0.479744	3.55111	3.53616	3.47688	3.52138	0.0392564
30
FEA		counting			mean	sd	pH			mean	sd	surcrose			mean	sd	glucose			mean	sd	fructose			mean	sd	ethanol			mean	sd	acetate			mean	sd
Y	0	6.30103	6.30103	6.30103	6.30103	0	3.73	3.76	3.82	3.77	0.0458258	0	0	0	0	0	0	0	0	0	0	9.64479	9.38855	9.14701	9.39345	0.248926	4.14483	4.24805	4.89097	4.42795	0.404295	2.68741	2.67836	2.68068	2.68215	0.00470067
	2	7.46687	7.01703	6.59106	7.02499	0.437956	3.69	3.62	3.7	3.67	0.043589	0	0	0	0	0	0	0	0	0	0	7.45497	7.39583	7.56889	7.47323	0.0879631	4.85629	4.81155	5.12654	4.93146	0.170419	2.67252	2.6778	2.66109	2.67047	0.00853665
	4	7.57978	7.62325	7.38021	7.52775	0.129606	3.53	3.52	3.6	3.55	0.043589	0	0	0	0	0	0	0	0	0	0	4.93062	4.93179	4.84348	4.90196	0.0506485	6.17648	6.24884	6.15351	6.19294	0.0497497	2.87699	2.76926	2.79702	2.81442	0.0559331
	6	7.69897	7.68124	7.60206	7.66076	0.0516003	3.53	3.56	3.65	3.58	0.06245	0	0	0	0	0	0	0	0	0	0	3.32233	3.44191	3.30007	3.35477	0.0762818	7.47506	7.464	7.77403	7.57103	0.17589	3.08529	3.15947	3.30349	3.18275	0.110947
	8	7.8451	7.77815	7.81291	7.81205	0.0334817	3.55	3.55	3.55	3.55	5.43896e-16	0	0	0	0	0	0	0	0	0	0	1.84076	1.98084	2.13618	1.98593	0.147773	8.12221	8.06877	7.95128	8.04742	0.0874422	3.29577	3.25018	3.39264	3.31286	0.0727547
	10	7.77815	7.74819	7.74036	7.75557	0.0199458	3.51	3.53	3.56	3.53333	0.0251661	0	0	0	0	0	0	0	0	0	0	1.2528	1.13507	1.10934	1.16573	0.0764906	7.701	7.92825	8.05635	7.8952	0.179967	3.29961	3.23716	3.26285	3.26654	0.0313881
