# Supplementary material for: A systematic, complexity-reduction approach to dissect the kombucha tea microbiome
Source: eLife. 2022 Aug 11;11:e76401. doi: 10.7554/eLife.76401 (PMC9371603; doi:10.7554/eLife.76401)
Supplement: Figure 6—source data 1. [file elife-76401-fig6-data1.xlsx]

## Sheet: Sucrose 50 g
B-Y	B-total	100-1	100-1	100-1	mean	s.d.	10-1	10-1	10-1	mean	s.d.	1-1	1-1	1-1	mean	s.d.	1-10	1-10	1-10	mean	s.d.	1-100	1-100	1-100	mean	s.d.
	0	7	6.66276	6.28217	6.64831	0.359134	6.38202	6.25768	6.32222	6.32064	0.0621843	6.24304	6.07918	6.04139	6.1212	0.10719	5.36173	5.30103	5.26717	5.30998	0.0479087	4.6902	4.29667	4.49276	4.49321	0.196766
	3	7.30103	7.44716	7.4609	7.40303	0.0886001	7	7.19312	7.37658	7.1899	0.188309	7.60206	7	7.06819	7.22342	0.329683	7.30103	6.89209	6.47422	6.88911	0.413415	7	6.64345	6.3075	6.65032	0.346303
	6	6.69897	6.79239	6.82607	6.77248	0.0658506	6.60206	6.60206	6.74819	6.65077	0.0843671	6.47712	6.38021	6.30963	6.38899	0.0840897	6.30103	6.44716	6.4183	6.38883	0.0773937	6.77815	6.44716	6.3927	6.53934	0.208606
	10	6.6	6.81954	6.68124	6.70026	0.111001	5.77815	6	6.15229	5.97681	0.188143	5.60206	5.60206	5.74819	5.65077	0.0843671	5.95424	5.60206	5.32634	5.62755	0.314728	6	5.90309	5.99564	5.96624	0.0547345
	Y-total
	0	4.85733	4.60206	4.26951	4.5763	0.294755	5.88081	5.38021	5.44716	5.56939	0.271766	6.85126	6.25527	6.17026	6.4256	0.371076	6.86923	6.38021	6.44091	6.56345	0.266548	6.59106	6.38021	6.35984	6.4437	0.128024
	3	7.30103	7.44716	7.59106	7.44642	0.145019	7	7.25527	7.57978	7.27835	0.29058	7.47712	7.41497	7.27416	7.38875	0.103992	7.30103	7.38021	7.50515	7.39546	0.102911	7.90309	7.79239	7.79934	7.83161	0.0620032
	6	7.47712	7.38917	7.51851	7.4616	0.066056	7.61278	7.41497	7.43136	7.48637	0.109781	7.25527	7.14613	7.15229	7.18456	0.0613137	7.44716	7.47712	7.54407	7.48945	0.0496172	7.49136	7.53148	7.5302	7.51768	0.0228014
	10	6.77815	6.77815	6.83251	6.79627	0.0313834	6.47712	6.47712	6.43136	6.46187	0.0264181	6.47712	6.47712	6.21219	6.38881	0.15296	6.14613	6.50515	6.10721	6.25283	0.219381	6	6	5.91908	5.97303	0.0467203
B-Y			BY100-1	BY100-1	BY100-1	mean	s.d.	BY10-1	BY10-1	BY10-1	mean	s.d.	BY1-1	BY1-1	BY1-1	mean	s.d.	BY1-10	BY1-10	BY1-10	mean	s.d.	BY1-100	BY1-100	BY1-100	mean	s.d.
	Source	0	47.73	50.0757	50.0757	49.2938	1.35432	46	44.1918	46	45.3973	1.04398	52.4635	54.9873	52.4635	53.3047	1.45713	44.547	49.2271	49.2271	47.6671	2.70207	41.5175	40.6272	45.5175	42.5541	2.60472
		3	29.7024	24.8299	34.6333	29.7218	4.90174	23.6667	22.8723	23.7828	23.4406	0.495601	12.7801	15.7035	20.9276	16.4704	4.12755	9.16992	18.1328	19.4159	15.5729	5.58211	6.07151	6.89398	6.07709	6.34753	0.473252
		6	12.8832	13.3276	12.8554	13.0221	0.264955	9.32702	8.05016	11.7925	9.72322	1.90235	2.09928	1.67982	1.89643	1.89184	0.20977	1.46881	2.03593	2.55564	2.02013	0.543589	0.640429	0.693015	0.693015	0.675486	0.0303605
		10	5.75814	5.81772	5	5.52529	0.455887	2.15562	2.49819	2.49819	2.384	0.197786	0	0	0	0	0	0.392146	0.10374	0.410374	0.302087	0.172015	0	0	0	0	0
	Ethanol	0	0	0	0	0	0	0	0	0	0	0	0	0	0	0	0	0	0	0	0	0	0	0	0	0	0
		3	9.25473	9.18517	8.69788	9.04593	0.303417	12.1956	11.6132	14.193	12.6673	1.35302	13.2193	13.4729	10.8477	12.5133	1.44804	13.0756	15.0087	13.9847	14.023	0.967089	16.6254	16.4503	11.4173	14.831	2.95763
		6	16.8794	17.2647	16.2648	16.803	0.504298	21.872	19.1892	18.4127	19.8246	1.81508	22.7603	22.2183	22.3333	22.4373	0.285585	23.6847	22.4599	21.883	22.6759	0.920034	24.9332	23.271	22.1971	23.4671	1.37856
		10	20.2912	19.3036	20.8317	20.1422	0.774871	23.012	22.9886	22.9633	22.988	0.0243263	22.6589	22.3226	22.437	22.4729	0.170973	23.1956	23.5025	22.6513	23.1165	0.43111	23.7383	22.3201	23.2825	23.1136	0.724024
	Acetate	0	0	0	0	0	0	0	0	0	0	0	0	0	0	0	0	0	0	0	0	0	0	0	0	0	0
		3	2.86875	2.15207	2.68013	2.56698	0.371496	2.64752	2.71996	3.11549	2.82766	0.251889	2.74087	3.12348	2.48274	2.78236	0.322379	1.95964	2.57306	3.03857	2.52376	0.541152	1.80579	2.49887	1.8265	2.04372	0.394307
		6	4.91815	4.45158	4.76137	4.71037	0.23743	4.9673	4.48458	4.5524	4.66809	0.26133	4.99898	5.20129	4.03643	4.74557	0.622405	4.48994	4.72748	4.18385	4.46709	0.272534	4.0407	4.57481	3.53004	4.04852	0.522429
		10	7.60036	7.24613	7.27411	7.37353	0.196935	7.22196	6.97384	6.96683	7.05421	0.145318	6.46309	7.10313	6.34887	6.63836	0.406531	6.17328	7.15326	5.64938	6.32531	0.763379	6.01259	6.37868	5.99114	6.12747	0.217818

## Sheet: Sucrose 100 g
B-Y	B-total	100-1	100-1	100-1	mean	s.d.	10-1	10-1	10-1	mean	s.d.	1-1	1-1	1-1	mean	s.d.	1-10	1-10	1-10	mean	s.d.	1-100	1-100	1-100	mean	s.d.
	0	6.29667	6.29667	6.29667	6.29667	1.53837e-15	6.25768	6.47712	6.18752	6.30744	0.151077	6	6	6	6	0	5.25768	5.25527	5.20412	5.23902	0.0302514	4.29667	4.30103	4	4.19923	0.172554
	3	7.78533	7.79239	7.78533	7.78768	0.00407716	7.53148	7.62325	7.54283	7.56585	0.0500309	7	7.20412	6.94448	7.04953	0.136723	6.95424	7.20412	6.77815	6.97884	0.214047	6.77815	6.77815	6.51055	6.68895	0.154503
	6	7.04139	7.20412	7.11727	7.12093	0.0814253	6.8451	6.77815	6.69461	6.77262	0.0753988	6.47712	6.47712	6.20952	6.38792	0.154503	6.8451	6.60206	6.72016	6.72244	0.121535	6.69897	6.60206	6.34242	6.54782	0.184359
	10	6.32222	6.25527	6.35603	6.31117	0.051277	6.30103	6.60206	6.38202	6.42837	0.155776	6.17609	6.60206	5.96848	6.24888	0.322999	6.17609	6.20412	6.23045	6.20355	0.0271833	6.27875	6.30103	6.43457	6.33812	0.0842687
	Y-total
	0	4.29667	4.30103	4.14613	4.24794	0.0881997	5.25768	5.25527	5.23553	5.24949	0.0121535	6	6	6	6	0	6.25768	6.14613	6.31175	6.23852	0.0844586	6.29667	6.47712	6.11394	6.29591	0.18159
	3	7.5563	7.62325	7.55509	7.57822	0.0390052	7.54407	7.53148	7.50515	7.5269	0.0198591	7.61278	7.53148	7.64345	7.59591	0.0578636	7.43136	7.38021	7.44716	7.41958	0.034995	7.41497	7.44716	7.47712	7.44642	0.0310806
	6	7.47712	7.44716	7.52504	7.48311	0.039287	7.5563	7.62325	7.51188	7.56381	0.0560614	7.6721	7.62325	7.6902	7.66185	0.0346304	7.716	7.79239	7.64836	7.71892	0.0720601	7.59106	7.57978	7.61278	7.59454	0.016773
	10	7.5563	7.53148	7.4624	7.51673	0.0486594	7.54407	7.53148	7.57403	7.54986	0.0218593	7.61278	7.64345	7.6721	7.64278	0.0296628	7.43136	7.73239	7.5563	7.57335	0.151238	7.41497	7.62325	7.46982	7.50268	0.107956
B-Y	100gl		BY100-1	BY100-1	BY100-1	mean	s.d.	BY10-1	BY10-1	BY10-1	mean	s.d.	BY1-1	BY1-1	BY1-1	mean	s.d.	BY1-10	BY1-10	BY1-10	mean	s.d.	BY1-100	BY1-100	BY1-100	mean	s.d.
	Sucrose	0	94.1723	93.4423	91.9115	93.1754	1.15375	94.1723	93.4423	91.9115	93.1754	1.15375	94.1723	93.4423	91.9115	93.1754	1.15375	94.1723	93.4423	91.9115	93.1754	1.15375	94.1723	93.4423	91.9115	93.1754	1.15375
		3	75.2193	65.3584	47.2153	62.5977	14.2046	59.3341	72.4079	60.5025	64.0815	7.23453	51.2877	50.8589	50.8948	51.0138	0.237889	41.7186	36.3056	41.3589	39.7944	3.02669	38.5884	37.9229	34.2793	36.9302	2.31973
		6	57.5994	51.5697	52.9802	54.0497	3.15391	41.3507	40.7383	41.3009	41.1299	0.340109	35.2657	36.6377	35.5226	35.8087	0.729378	17.972	25.0718	21.2794	21.4411	3.55267	22.394	22.0213	19.8621	21.4258	1.36693
		10	37.0163	35.9194	31.6637	34.8665	2.82739	21.6151	24.2156	21.9668	22.5991	1.41087	15.4221	17.3007	16.6159	16.4462	0.95069	11.1894	11.0076	11.0861	11.0944	0.0911881	10.1815	10.1786	10.1844	10.1815	0.002925
	Ethanol	0	0	0	0	0	0	0	0	0	0	0	0	0	0	0	0	0	0	0	0	0	0	0	0	0	0
		3	5.9128	5.46126	5.80404	5.72603	0.235661	10.5966	12.1968	11.0711	11.2882	0.82188	13.3259	12.3471	13.2979	12.9903	0.557185	16.0199	17.0381	16.1498	16.4026	0.554175	17.1294	16.7843	17.1043	17.006	0.192416
		6	14.2073	14.2571	15.5325	14.6656	0.751169	22.6831	22.2255	19.7378	21.5488	1.58497	24.9829	24.8579	24.1428	24.6612	0.453258	34.2224	33.4626	28.9495	32.2115	2.85037	31.0687	28.6149	30.1842	29.956	1.24271
		10	21.1651	21.2285	24.7985	22.3974	2.07969	32.8336	32.4027	29.7859	31.6741	1.64932	34.0823	34.0467	33.8631	33.9974	0.11761	44.9823	40.0218	40.1119	41.7053	2.83828	40.0979	44.0664	40.6295	41.5979	2.15417												0.6414
	Acetate	0	0	0	0	0	0	0	0	0	0	0	0	0	0	0	0	0	0	0	0	0	0	0	0	0	0												0.19672
		3	1.97956	1.89543	1.75854	1.87784	0.111552	2.00142	3.06101	2.28151	2.44798	0.54906	1.88081	2.03434	2.42306	2.11274	0.279497	1.28037	2.12868	1.71748	1.70884	0.424223	1.65514	1.56163	1.64827	1.62168	0.0521181												0.45069
		6	3.89958	3.43157	3.83913	3.72343	0.254555	3.37429	3.72485	3.4294	3.50951	0.188515	3.42415	4.07898	3.40382	3.63565	0.38407	3.66314	3.23441	3.20603	3.36786	0.256113	2.80292	2.67939	2.741	2.7411	0.0617631												0.12824
		10	3.87658	4.07812	4.96132	4.30534	0.576964	4.47278	5.13339	4.48011	4.69543	0.379302	4.27741	4.9028	4.38057	4.52026	0.335281	3.39849	4.50782	3.99888	3.9684	0.55529	4.24127	4.34844	4.5222	4.37064	0.141773												0.06625
