# Supplementary material for: A systematic, complexity-reduction approach to dissect the kombucha tea microbiome
Source: eLife. 2022 Aug 11;11:e76401. doi: 10.7554/eLife.76401 (PMC9371603; doi:10.7554/eLife.76401)
Supplement: Figure 6—source data 2. [file elife-76401-fig6-data2.xlsx]

## Sheet: B2+different Y
B	B2+Y1			B2+Y2			B2+Y3			B2+Y4			B2+Y5
0	1000000	1000000	400000	1000000	1000000	1800000	1000000	1000000	2400000	1000000	1000000	2400000	1000000	1000000	700000
3	200000	800000	800000	1400000	1600000	1800000	180000	120000	180000	3400000	3600000	2400000	1800000	2200000	2000000
6	2200000	2600000	2000000	4200000	5600000	18000000	20000	40000	20000	8000000	7400000	18000000	5400000	5600000	12000000
10	680000	580000	780000	4400000	4000000	4000000	200	200	2000	860000	920000	800000	840000	860000	800000
Y	B2+Y1			B2+Y2			B2+Y3			B2+Y4			B2+Y5
0	1000000	1000000	1300000	1000000	1000000	1500000	1300000	1000000	7000000	2100000	1000000	5000000	1000000	1000000	1000000
3	42000000	38000000	44000000	16000000	18000000	22000000	12000000	10000000	8000000	26000000	32000000	28000000	16000000	16000000	18000000
6	38000000	40000000	44000000	26000000	26000000	26000000	12000000	14000000	8000000	38000000	34000000	28000000	16000000	8000000	16000000
10	58000000	48000000	46000000	34000000	22000000	32000000	18000000	18000000	18000000	38000000	34000000	40000000	14000000	18000000	12000000
B/Y	B2+Y1	B2+Y2	B2+Y3	B2+Y4	B2+Y5
0	0.727273	1.08571	0.473118	0.54321	0.9
3	0.0145161	0.0857143	0.016	0.109302	0.12
6	0.0557377	0.35641	0.00235294	0.334	0.575
10	0.0134211	0.140909	4.44444e-05	0.0230357	0.0568182
		B2+Y1	B2+Y1	B2+Y1	mean	s.d.	B2+Y2	B2+Y2	B2+Y2	mean	s.d.	B2+Y3	B2+Y3	B2+Y3	mean	s.d.	B2+Y4	B2+Y4	B2+Y4	mean	s.d.	B2+Y5	B2+Y5	B2+Y5	mean	s.d.
Sucrose	0	49.1523	49.2932	49.249	49.2315	0.0720672	49.3126	49.3107	49.0712	49.2315	0.138818	51.1378	51.1553	51.1729	51.1553	0.01755	49.9229	50	49.1905	49.7045	0.446768	47.6553	48	45.9286	47.1946	1.10991
	3	39.2949	40.1827	39.5154	39.6643	0.462248	31.0041	31.8169	30.7958	31.2056	0.539534	54.4149	46.3857	48.8274	49.876	4.11599	31.009	31.3925	31.3151	31.2389	0.20279	4.16389	3.42361	3.41401	3.66717	0.430199
	6	31.5902	32.343	34.2347	32.7227	1.36252	21.9648	22.2433	20.8573	21.6885	0.733187	47.0257	44.6323	44.9643	45.5408	1.29662	20.4347	22.5267	22.2539	21.7384	1.13724	0.7828	0.748556	1.05052	0.860624	0.16534
	10	23.5467	23.8723	25.9357	24.4516	1.29557	12.0494	12.2619	11.7812	12.0308	0.240857	46.5619	46.7348	45.9194	46.4054	0.429605	14.897	15.1159	14.4973	14.8367	0.313676	0.38573	0.362143	0.335262	0.361045	0.0252519
Ethanol	0	0	0	0	0	0	0	0	0	0	0	0	0	0	0	0	0	0	0	0	0	0	0	0	0	0
	3	2.81868	2.87818	3.24856	2.98181	0.23292	2.49212	2.76842	2.76401	2.67485	0.158264	0	0	0	0	0	7.78252	6.77682	6.90241	7.15392	0.547997	10.2061	10.2142	10.0373	10.1525	0.0998825
	6	6.40645	6.69169	6.42967	6.50927	0.158406	10.3798	10.5838	9.91094	10.2915	0.345007	0	0	0	0	0	12.404	12.351	12.7263	12.4938	0.203114	22.0228	22.2692	18.2597	20.8506	2.24717
	10	10.3376	10.599	10.8398	10.5921	0.251173	14.0759	14.7086	14.1961	14.3269	0.33599	0	0	0	0	0	17.3161	16.8566	16.8722	17.015	0.260898	22.301	21.2809	23.5216	22.3678	1.12184
Acetate	0	0	0	0	0	0	0	0	0	0	0	0	0	0	0	0	0	0	0	0	0	0	0	0	0	0
	3	0.494706	0.42679	0.51531	0.478935	0.0463196	0.84322	0.724658	0.984132	0.85067	0.129897	0	0	0	0	0	0.85909	0.838691	0.919015	0.872265	0.0417517	2.25499	2.13818	2.21099	2.20139	0.0589938
	6	1.97671	1.87788	2.00284	1.95247	0.0659086	2.63983	2.53881	2.63621	2.60495	0.0573075	0	0	0	0	0	2.79573	2.95424	2.64648	2.79881	0.153906	3.39394	3.47886	3.15825	3.34368	0.166106
	10	2.9	2.78383	2.86617	2.85	0.0597492	3.6488	3.7	3.4512	3.6	0.131383	0	0	0	0	0	3.63607	3.8	3.72901	3.72169	0.0822098	4.94486	5	4.75514	4.9	0.128446

## Sheet: Different B+Y1
B		B1+Y1			B2+Y1			B3+Y1			B4+Y1			B5+Y1
0		1000000	1000000	400000	1000000	1000000	1800000	1000000	1000000	2400000	1000000	1000000	2400000	1000000	1000000	700000
3		54000000	48000000	48000000	1000000	200000	400000	8400000	7800000	10000000	22000000	12000000	11800000	14000000	24000000	15000000
6		22000000	12200000	10600000	3400000	1600000	2800000	3600000	3800000	3000000	10600000	10000000	8000000	4200000	3400000	3600000
10		3800000	4000000	5200000	1600000	1200000	1600000	600000	600000	600000	3600000	2800000	3200000	1400000	1400000	240000
Y		B1+Y1			B2+Y1			B3+Y1			B4+Y1			B5+Y1
0		1000000	1000000	1300000	1000000	1000000	1500000	1300000	1000000	7000000	2100000	1000000	5000000	1000000	1000000	1000000
3		34000000	42000000	40000000	50000000	38000000	40000000	34000000	38000000	40000000	34000000	32000000	46000000	28000000	22000000	30000000
6		56000000	36000000	48000000	68000000	56000000	54000000	78000000	32000000	40000000	46000000	42000000	48000000	38000000	36000000	50000000
10		42000000	40000000	40000000	60000000	58000000	56000000	50000000	46000000	46000000	40000000	38000000	48000000	40000000	38000000	42000000
B/Y	0	0.727273	1.08571	0.473118	0.54321	0.9
	3	1.2931	0.0125	0.233929	0.408929	0.6625
	6	0.32	0.0438202	0.0693333	0.210294	0.0903226
	10	0.106557	0.0252874	0.0126761	0.0761905	0.0253333
		B1+Y1	B1+Y1	B1+Y1	mean	s.d.	B2+Y1	B2+Y1	B2+Y1	mean	s.d.	B3+Y1	B3+Y1	B3+Y1	mean	s.d.	B4+Y1	B4+Y1	B4+Y1	mean	s.d.	B5+Y1	B5+Y1	B5+Y1	mean	s.d.
Sucrose	0	52.2241	50.0207	47.1493	49.798	2.54469	49.6538	49	53.3345	50.6628	2.33677	52.0524	51.6578	49.3684	51.0262	1.44919	54.8604	49	49.8775	51.246	3.16081	50.532	50	50.107	50.213	0.281376
	3	33.0127	32.3076	32.9459	32.7554	0.389273	37.8819	39.0841	38.9454	38.6371	0.657735	33.3006	33.4421	33.3853	33.376	0.0712258	36.9335	36.9175	36.9798	36.9436	0.0323992	41.691	40.8638	41.8824	41.4791	0.541391
	6	30.7568	31.0134	34.1435	31.9712	1.88562	22.3609	30.3802	29.225	27.322	4.33512	27.2267	27.8864	31.7161	28.9431	2.4241	37.28	41.3375	33.443	37.3535	3.94775	32.5871	36.1581	35.6402	34.7951	1.92962
	10	29.4774	29.7077	29.6967	29.6273	0.129891	25.162	24.5618	26.4471	25.3903	0.963201	25.7424	25.7466	23.3899	24.9596	1.35944	28.2013	27.9657	31.1455	29.1042	1.77179	26.5811	25.7336	28.8854	27.0667	1.63105
Ethanol	0	0	0	0	0	0	0	0	0	0	0	0	0	0	0	0	0	0	0	0	0	0	0	0	0	0
	3	1.88049	1.91704	2.13737	1.9783	0.138966	2.06167	3.15333	2.04904	2.42135	0.633949	2.38102	2.51584	3.36745	2.75477	0.534861	2.08494	1.99657	1.90974	1.99708	0.0875986	2.21192	2.26198	1.89666	2.12352	0.198055
	6	4.41765	4.5938	4.46824	4.49323	0.090695	8.32888	8.12044	8.15743	8.20225	0.111213	5.59976	6.2943	7.27673	6.39026	0.842596	5.03393	6.28408	4.15426	5.15742	1.07026	6.39599	4.56268	4.85596	5.27154	0.984777
	10	6.37326	6.47247	7.03224	6.62599	0.355303	12.2776	12.4628	12.3836	12.3746	0.092938	10.6957	10.7668	10.8562	10.7729	0.0804514	7.19906	7.36859	6.48159	7.01641	0.47086	6.32044	9.18899	8.79774	8.10239	1.55556
Acetate	0	0	0	0	0	0	0	0	0	0	0	0	0	0	0	0	0	0	0	0	0	0	0	0	0	0
	3	3.60303	3.59771	2.4517	3.21748	0.66319	0	0	0	0	0	1.44736	1.28488	0.239625	0.990622	0.655437	3.54564	2.47252	3.909	3.30905	0.746895	3.47388	2.2984	6.14599	3.97276	1.97171
	6	5.19545	4.47627	5.09014	4.92062	0.388404	0.64952	0.695049	0.688244	0.677604	0.0245587	3.17451	3.1421	3.11827	3.14496	0.0282289	5.42648	5.55428	4.89854	5.2931	0.347623	4.68215	6.13448	3.53529	4.78397	1.30258
	10	6.91659	6.8696	6.59232	6.79284	0.175238	2.15579	3.21852	3.43392	2.93608	0.684275	4.97745	4.54087	4.85063	4.78965	0.224587	6.65728	6.08602	7.00269	6.582	0.462947	7.28549	5.78119	8.35802	7.14156	1.29443
